# Supplementary material for: Integrated transcriptomic and metabolic analyses provide insights into the maintenance of embryogenic potential and the biosynthesis of phenolic acids and flavonoids involving transcription factors in Larix kaempferi (Lamb.) Carr
Source: Front Plant Sci. 2022 Nov 17;13:1056930. doi: 10.3389/fpls.2022.1056930 (PMC9714495; doi:10.3389/fpls.2022.1056930)
Supplement: Supplementary file 10 [file Table_3.xlsx]

## Sheet: Sheet1
Supplementary Table 3. Classification and KEGG pathway information of 835 identified metabolites
Meta ID	Molecular Weight (Da)	Formula	Compounds	Class I	Class II	EC-1_CPS	EC-2_CPS	EC-3_CPS	NEC-1_CPS	NEC-2_CPS	NEC-3_CPS	cpd_ID	KEGG_map
pme3200	73.097	C2H7N3	1-methylguanidine	Nucleotides and derivatives	Nucleotides and derivatives	102960	70421	45490	9	9	9	--	--
mws0217	75.032	C2H5NO2	L-Glycine	Amino acids and derivatives	Amino acids and derivatives	165390	117530	121030	90195	28227	71727	C00037	ko00230,ko00260,ko00310,ko00440,ko00460,ko00480,ko00630,ko00730,ko00860,ko00970,ko01100,ko01110,ko01200,ko01230,ko01240,ko02010
MWS0502	89.048	C3H7NO2	β-Alanine	Amino acids and derivatives	Amino acids and derivatives	188300	130780	103370	184210	50826	116270	C00099	ko00240,ko00410,ko00640,ko00770,ko01100,ko01110,ko01240
ML10198895	89.048	C3H7NO2	N-Methylglycine	Amino acids and derivatives	Amino acids and derivatives	76069	44583	30028	12112	18386	41999	C00213	ko00260,ko00330,ko01100
pme1987	89.048	C3H7NO2	L-Alanine	Amino acids and derivatives	Amino acids and derivatives	21800	14652	19863	11033	16999	17628	C00041	ko00250,ko00270,ko00430,ko00450,ko00710,ko00970,ko00998,ko01100,ko01110,ko01200,ko01230,ko02010,ko04122
pme2601	90.032	C3H6O3	3-Hydroxypropanoic acid	Organic acids	Organic acids	82989	111530	106590	90493	74159	48848	C01013	ko00240,ko00410,ko00640,ko01100,ko01200
Lmgn000188	90.032	C3H6O3	D-Lactic Acid	Organic acids	Organic acids	6423.2	16335	11758	42549	17823	9130.6	C00256	ko00620,ko01100
Lmlp001319	90.068	C4H10O2	2,3-Butanediol	Others	Saccharides and Alcohols	613500	633390	668420	441780	266590	390910	C10670	--
Lmqp000873	100.018	C4H4O3	Succinic anhydride	Organic acids	Organic acids	680900	623720	482780	503610	212400	257730	C19524	--
MWS4316	100.052	C5H8O2	3-Methacrylic acid	Organic acids	Organic acids	9	9	9	702600	521200	670410	--	--
mws4052	101.048	C4H7NO2	1-Aminocyclopropane-1-carboxylic acid	Organic acids	Organic acids	1016700	523020	761080	937880	736720	857250	C01234	ko00270,ko01100,ko01110
MWSmce461	101.1	C4H7NO2	L-Azetidine-2-carboxylic acid	Amino acids and derivatives	Amino acids and derivatives	1236000	1294900	792750	2637900	2284200	2438300	--	--
pme3033	103.063	C4H9NO2	N,N-Dimethylglycine	Amino acids and derivatives	Amino acids and derivatives	2594100	2051600	2408600	7006800	3222100	5460500	C01026	ko00260,ko01100
pme3017	103.063	C4H9NO2	2-Aminoisobutyric acid	Organic acids	Organic acids	3255000	3149300	3540100	4577400	4856400	4466400	C03665	--
pme3011	103.063	C4H9NO2	γ-Aminobutyric acid	Organic acids	Organic acids	4448800	3675700	4482000	11907000	4683100	9373300	C00334	ko00250,ko00330,ko00410,ko00650,ko00760,ko01100
pmb0484	103.091	C5H13NO	Choline	Alkaloids	Alkaloids	17311000	16828000	17366000	35379000	43755000	35932000	C00114	ko00260,ko00564,ko01100,ko02010
mws0576	104.047	C4H8O3	3-Hydroxybutyrate	Organic acids	Organic acids	191150	257220	267440	577320	129280	532810	--	--
pme1975	104.06	C3H4O4	Malonic acid	Organic acids	Organic acids	738150	939870	859870	360720	294240	274460	C00383	ko00061,ko00240,ko00410,ko01100,ko01212
pme0010	105.043	C3H7NO3	L-Serine	Amino acids and derivatives	Amino acids and derivatives	3266000	2431900	2805300	4361000	3434700	3698000	C00065	ko00260,ko00261,ko00270,ko00460,ko00564,ko00600,ko00630,ko00920,ko00970,ko01100,ko01110,ko01200,ko01230,ko01240,ko02010
pme2433	105.079	C4H11NO2	Diethanolamine	Alkaloids	Alkaloids	55431	56448	70483	35703	36523	43160	C06772	ko00564
MWS2076	109.053	C6H7NO	2-Aminophenol	Alkaloids	Phenolamine	9	10861	9	28606	59351	43218	C01987	ko00380,ko01100
mws0601	111.032	C5H5NO2	Pyrrole-2-carboxylic acid	Organic acids	Organic acids	166640	169080	200160	9	9	9	C05942	ko00330
mws0255	111.043	C4H5N3O	Cytosine	Nucleotides and derivatives	Nucleotides and derivatives	1919100	1544500	1677100	1172900	1342500	1458700	C00380	ko00240,ko01100
MWS5173	111.043	C4H5N3O	Isocytosine	Nucleotides and derivatives	Nucleotides and derivatives	12099	54565	67111	978100	1432200	1454500	--	--
pme0006	115.063	C5H9NO2	L-Proline	Amino acids and derivatives	Amino acids and derivatives	3521100	3800300	4355600	888490	313700	870080	C00148	ko00330,ko00332,ko00970,ko01100,ko01110,ko01230,ko02010
mws0376	116.011	C4H4O4	Fumaric acid	Organic acids	Organic acids	483750	464420	504790	1349600	4084500	1323100	C00122	ko00020,ko00190,ko00220,ko00250,ko00350,ko00360,ko00620,ko00650,ko00760,ko01100,ko01110,ko01200
pmb1096	117.058	C8H7N	Indole	Alkaloids	Plumerane	743570	780630	754360	639210	492120	535330	C00463	ko00380,ko00400,ko00402,ko01100,ko01110
MWS5209	117.079	C5H11NO2	N-Methyl-α-aminoisobutyric acid	Amino acids and derivatives	Amino acids and derivatives	42339	38109	60169	50924	27413	50440	--	--
pme0120	117.079	C5H11NO2	5-Aminovaleric acid	Organic acids	Organic acids	34292	38777	31587	79019	33603	53803	C00431	ko00310,ko00330,ko01100
mws0256	117.079	C5H11NO2	L-Valine	Amino acids and derivatives	Amino acids and derivatives	53912000	28121000	55348000	51286000	52875000	64998000	C00183	ko00280,ko00290,ko00311,ko00460,ko00770,ko00966,ko00970,ko01100,ko01110,ko01210,ko01230,ko01240,ko02010
mws0191	117.079	C5H11NO2	Betaine	Alkaloids	Alkaloids	1530400	917950	1061500	1721600	2581400	1054200	C00719	ko00260,ko01100,ko02010
mws0192	118.027	C4H6O4	Succinic acid	Organic acids	Organic acids	190050000	120370000	131310000	61610000	67921000	49214000	C00042	ko00020,ko00190,ko00250,ko00310,ko00350,ko00360,ko00620,ko00630,ko00640,ko00650,ko00760,ko00920,ko01100,ko01110,ko01200
mws0147	118.063	C5H10O3	3-Hydroxy-3-methyl butyric acid	Organic acids	Organic acids	1957500	5381600	3257500	156630	333120	216220	--	--
pme3096	119.022	C3H5NO4	Aminomalonic acid	Organic acids	Organic acids	9526800	5267600	5780800	1095600	2682200	1857200	C00872	--
mws0671	119.058	C4H9NO3	L-Homoserine	Amino acids and derivatives	Amino acids and derivatives	7361100	6621900	6497500	4479300	3102700	3084300	C00263	ko00260,ko00270,ko00300,ko00920,ko01100,ko01110,ko01230
mws0230	119.058	C4H9NO3	L-(-)-Threonine	Amino acids and derivatives	Amino acids and derivatives	6415400	6345600	6351700	3753800	3045800	3044200	C00188	ko00260,ko00261,ko00290,ko00860,ko00970,ko01100,ko01110,ko01230,ko02010
pmp001287	119.073	C8H9N	N-Benzylmethylene isomethylamine	Alkaloids	Alkaloids	19688000	25673000	22943000	10234000	9023300	6959800	--	--
MWS4305	120.042	C4H8O4	Erythrose	Others	Saccharides and Alcohols	218190	183830	187320	181220	295840	302740	C01796	--
pme0195	121.02	C3H7NO2S	L-Cysteine	Amino acids and derivatives	Amino acids and derivatives	82407	166820	182050	138910	96704	76121	C00097	ko00260,ko00270,ko00311,ko00332,ko00430,ko00460,ko00480,ko00730,ko00770,ko00920,ko00970,ko01100,ko01110,ko01200,ko01230,ko01240,ko04122
pmb0069	121.053	C7H7NO	Benzamide	Phenolic acids	Phenolic acids	35883	63413	101390	89249	86344	59974	C09815	--
mws0628	122.037	C7H6O2	4-Hydroxybenzaldehyde	Phenolic acids	Phenolic acids	2058800	1842500	1726800	850690	561370	585660	C00633	ko01100
mws0133	122.048	C6H6N2O	Nicotinamide	Others	Vitamin	1335200	1588700	1868700	4402400	2868000	2812000	C00153	ko00760,ko01100,ko01240
pme2134	122.058	C4H10O4	Threitol	Others	Saccharides and Alcohols	1704200	1999900	1926300	536570	2965100	822920	C16884	--
pme0490	123.032	C6H5NO2	Nicotinic acid*	Others	Vitamin	7447700	18141000	17887000	235450	718070	298710	C00253	ko00760,ko00960,ko01100,ko01110,ko01240
Lmbp000668	123.032	C6H5NO2	Isonicotinic acid*	Others	Vitamin	7814700	17965000	19173000	245310	623170	299340	C07446	--
pme1216	123.032	C6H5NO2	2-Picolinic acid	Organic acids	Organic acids	4724700	7928200	9306200	143370	431160	166400	C10164	ko00380,ko01100
HJN025	124.052	C7H8O2	4-Hydroxybenzyl Alcohol	Phenolic acids	Phenolic acids	9	9	9	52319	430040	65858	C17467	--
mws0566	124.052	C7H8O2	4-Methylcatechol	Phenolic acids	Phenolic acids	9	9	9	23626	188060	21850	C06730	ko01100
mws0572	125.059	C5H7N3O	5-Methylcytosine	Nucleotides and derivatives	Nucleotides and derivatives	128370	66153	92939	9	9	9	C02376	ko00240,ko01100
mws0251	126.043	C5H6N2O2	Thymine	Nucleotides and derivatives	Nucleotides and derivatives	9	9	9	80899	122940	57785	C00178	ko00240,ko01100
MWSmce448	126.043	C5H6N2O2	Imidazol-1-yl-acetic acid	Organic acids	Organic acids	9	9	9	705480	448120	649700	--	--
MWSmce706	128.059	C5H8N2O2	Cyclo(Ala-Gly)	Amino acids and derivatives	Amino acids and derivatives	2251100	3317800	3696900	4911600	4859300	5485400	--	--
MWS0813	129.043	C5H7NO3	5-Oxoproline	Amino acids and derivatives	Amino acids and derivatives	326240	363270	390340	262990	187750	257370	C02237	ko01100
mws0263	129.043	C5H7NO3	L-PyroglutamicAcid	Amino acids and derivatives	Amino acids and derivatives	384230	305380	356540	291710	234850	253600	C01879	ko00480,ko01100
Rfmb319	129.079	C6H11NO2	Pipecolic acid	Organic acids	Organic acids	7646000	11499000	11648000	6001500	1834900	2907800	C00408	ko00310,ko00960,ko01100,ko01110
ML10181668	129.079	C6H11NO2	Cycloleucine	Amino acids and derivatives	Amino acids and derivatives	2614500	2414000	2295100	951570	876090	1029500	C03969	--
Zmdp000376	129.09	C5H11N3O	4-Guanidinobutanal	Others	Others	38449000	57255000	57288000	24230000	14422000	19111000	--	--
mws0425	130.027	C5H6O4	Citraconic acid	Organic acids	Organic acids	9	9	9	235510	694900	206940	C02226	ko00290,ko00660,ko01100,ko01210
Zmgn000217	130.027	C5H6O4	Methylenesuccinic acid	Organic acids	Organic acids	17043	23602	9333	43395	63496	46799	C00490	ko00660,ko01100
pme2693	130.111	C6H14N2O	N-Acetylputrescine	Alkaloids	Alkaloids	188370	223940	282770	1247500	1828000	1136000	C02714	ko00330,ko01100
mws1570	131.058	C5H9NO3	Cis-4-Hydroxy-D-proline	Amino acids and derivatives	Amino acids and derivatives	263780	296410	293090	1496200	1240800	642820	C03440	ko00330,ko01100
mws0216	131.058	C5H9NO3	Trans-4-Hydroxy-L-proline	Amino acids and derivatives	Amino acids and derivatives	14340000	10483000	10317000	18922000	14407000	14596000	C01157	ko00330,ko01100,ko02010
mws0712	131.058	C5H9NO3	N-Propionylglycine	Amino acids and derivatives	Amino acids and derivatives	9	9	9	66950	52786	56840	--	--
Zmpn000638	131.069	C4H9N3O2	3-Guanidinopropionic acid	Organic acids	Organic acids	55514	66826	70756	264660	171330	186050	C03065	--
pme0274	131.095	C6H13NO2	6-Aminocaproic acid	Organic acids	Organic acids	852500	980380	908120	729840	686230	611470	C02378	ko01100
pme2679	131.095	C6H13NO2	L-Allo-Isoleucine	Amino acids and derivatives	Amino acids and derivatives	58831000	45053000	46906000	70771000	55247000	44924000	C21096	--
mws1587	131.095	C6H13NO2	α-Aminocaproic acid*	Amino acids and derivatives	Amino acids and derivatives	7900500	8740500	8833300	7120800	7059600	6409500	--	--
pmp001198	131.095	C6H13NO2	6-Deoxyfagomine	Alkaloids	Piperidine alkaloids	27654000	29537000	29599000	21766000	23546000	20511000	--	--
mws0258	131.095	C6H13NO2	L-Isoleucine*	Amino acids and derivatives	Amino acids and derivatives	8441500	9166500	8826800	7151400	7316800	6620200	C00407	ko00280,ko00290,ko00460,ko00960,ko00966,ko00970,ko01100,ko01110,ko01210,ko01230,ko02010
mws0227	131.095	C6H13NO2	L-Leucine*	Amino acids and derivatives	Amino acids and derivatives	8454400	9044400	8798300	7147400	7464100	6291100	C00123	ko00280,ko00290,ko00966,ko00970,ko01100,ko01110,ko01210,ko01230,ko02010
Lmbn001288	132.042	C5H8O4	2-Hydroxy-2-methyl-3-oxobutanoic acid	Organic acids	Organic acids	82887	43585	69794	39535	51036	37070	C06010	ko00290,ko00650,ko00660,ko00770,ko01100,ko01110,ko01210,ko01230
mws0473	132.042	C5H8O4	2-Methylsuccinic acid	Organic acids	Organic acids	804270	732780	809820	421300	494670	441030	--	--
Lmmn000806	132.042	C5H8O4	Dimethylmalonic acid	Organic acids	Organic acids	100580	71614	104010	14130	66409	45691	--	--
pme0243	132.042	C5H8O4	Glutaric acid	Organic acids	Organic acids	1564300	1548000	1050100	444250	188460	163230	C00489	ko00071,ko00310,ko01100
Lmmn002164	132.042	C5H8O4	Monomethyl succinate	Organic acids	Organic acids	92407	83851	88705	48346	55800	47942	--	--
Lmgn000160	132.053	C4H8N2O3	3-Ureidopropionic Acid	Organic acids	Organic acids	46626	64257	52247	44422	64705	40220	C02642	ko00240,ko00410,ko00770,ko01100
mws0001	132.054	C4H8N2O3	L-Asparagine	Amino acids and derivatives	Amino acids and derivatives	2123000	1830700	1751300	2602800	2659700	2834800	C00152	ko00250,ko00460,ko00970,ko01100,ko01110,ko01230
mws0972	132.079	C6H12O3	6-Hydroxyhexanoic acid	Organic acids	Organic acids	36605	30375	38552	62745	13630	40837	C06103	--
pme2527	132.09	C5H12N2O2	L-Ornithine	Amino acids and derivatives	Amino acids and derivatives	22192	22579	35133	90832	227740	132110	C00077	ko00220,ko00330,ko00472,ko00480,ko01100,ko01110,ko01210,ko01230,ko02010
pmf0588	133.038	C4H7NO4	Aspartic acid	Amino acids and derivatives	Amino acids and derivatives	2155400	2127400	2557300	3490000	4098500	3414500	C16433	--
MWS1882	133.038	C4H7NO4	Iminodiacetic acid	Organic acids	Organic acids	242760	169670	124950	272900	258660	224850	C19911	--
mws0219	133.038	C4H7NO4	L-AsparticAcid	Amino acids and derivatives	Amino acids and derivatives	1508300	1418600	1150300	2826900	3322400	2406500	C00049	ko00220,ko00250,ko00260,ko00261,ko00270,ko00300,ko00340,ko00410,ko00460,ko00710,ko00760,ko00770,ko00970,ko01100,ko01110,ko01200,ko01210,ko01230,ko01240,ko02010
Lmbn000198	134.022	C4H6O5	3-Dehydro-L-Threonic Acid	Others	Saccharides and Alcohols	47099000	30876000	32622000	53008000	77891000	70372000	C03064	ko00053,ko01100
mws0275	134.022	C4H6O5	L-(-)-Malic acid	Organic acids	Organic acids	2164900	1498300	1341400	2585600	3589900	1789000	C00149	ko00020,ko00620,ko00630,ko00710,ko01100,ko01110,ko01200
Zmdp000972	135.035	C4H9NO2S	S-Methyl-L-cysteine	Amino acids and derivatives	Amino acids and derivatives	2267500	2887300	2917400	1962100	926480	1345500	C22040	ko02010
pme0040	135.054	C5H5N5	Adenine	Nucleotides and derivatives	Nucleotides and derivatives	1220200	1008800	1212700	4080600	4989100	2786100	C00147	ko00230,ko00908,ko01100
HJKP000649	135.068	C8H9NO	N-benzylformamide	Alkaloids	Alkaloids	2457300	3172700	3150700	2145500	1154700	1586500	C15561	--
mws0889	136.037	C4H8O5	D-Threonic Acid	Others	Saccharides and Alcohols	572640	599300	762040	486120	903010	601110	C21649	--
pme1173	136.039	C5H4N4O	Allopurinol	Nucleotides and derivatives	Nucleotides and derivatives	37292	52427	41371	39407	34045	64501	--	--
pme0033	136.039	C5H4N4O	Hypoxanthine	Nucleotides and derivatives	Nucleotides and derivatives	35526	45742	61719	49261	39454	79244	C00262	ko00230,ko01100
MWS1848	136.052	C8H8O2	Phenyl acetate	Phenolic acids	Phenolic acids	147990	112460	99715	77888	88645	67216	C00548	--
Hmbn002174	136.053	C8H8O2	4-Hydroxyacetophenone	Phenolic acids	Phenolic acids	13632	14206	22891	14963	8654.9	8545.3	C10700	ko01100
MWSmce247	136.15	C8H8O2	o-Toluic acid	Phenolic acids	Phenolic acids	5248.8	6389.1	5286.5	7287.8	3861.5	4778.6	C07215	ko01100
mws0146	137.048	C7H7NO2	Nicotinic Acid Methyl Ester(Methyl Nicotinate)	Alkaloids	Pyridine alkaloids	425590	1023500	1518200	934460	2950200	1476400	--	--
mws1078	137.048	C7H7NO2	Anthranilic Acid	Phenolic acids	Phenolic acids	9	27121	16953	61776	45466	41177	C00108	ko00380,ko00400,ko00998,ko01058,ko01100,ko01110,ko01230
pme2268	137.048	C7H7NO2	Trigonelline	Alkaloids	Pyridine alkaloids	1208300	761970	1478200	8462900	17547000	13028000	C01004	ko00760
Lmqp002784	137.048	C7H7NO2	Salicylamide	Alkaloids	Phenolamine	26084	32053	45628	112580	97999	88635	--	--
pme2482	138.032	C7H6O3	Protocatechuic aldehyde	Phenolic acids	Phenolic acids	16153	33431	69871	286880	512900	314550	C16700	ko00950
Lmbn001981	138.032	C7H6O3	2,5-Dihydroxybenzaldehyde	Phenolic acids	Phenolic acids	2939100	1914200	2140000	267830	371620	210750	C05585	ko00350,ko01100
Lmgn001670	138.032	C7H6O3	Salicylic acid	Phenolic acids	Phenolic acids	39596	26073	58281	422490	779170	354210	C00805	ko00360,ko01100,ko01110,ko04075
mws0749	138.032	C7H6O3	4-Hydroxybenzoic acid	Phenolic acids	Phenolic acids	3418000	2022300	2392500	294140	326890	265370	C00156	ko00130,ko00790,ko01100,ko01110,ko01240
mws2368	138.068	C8H10O2	Tyrosol	Phenolic acids	Phenolic acids	9	9	9	36605	116840	39556	C06044	ko00350,ko01100
pme2828	139.027	C6H5NO3	4-Nitrophenol	Phenolic acids	Phenolic acids	3807700	2212200	2009600	3435800	831610	2343200	C00870	--
MWSmce585	139.58	C4H10ClNO2	Methyl 3-aminopropanoate (hydrochloride)	Amino acids and derivatives	Amino acids and derivatives	1471800	1303600	1491000	3543500	3863200	3474700	--	--
mws0704	141.019	C2H8NO4P	O-Phosphorylethanolamine	Alkaloids	Alkaloids	183340	172080	204010	90113	37970	99989	C00346	ko00563,ko00564,ko00600,ko01100
pmb0764	143.04	C6H9NOS	4-Methyl-5-thiazoleethanol	Others	Others	1804600	2021300	1982800	1325500	1172700	1206600	C04294	ko00730,ko01100,ko01240
mws0103	145.053	C9H7NO	Indole-3-carboxaldehyde	Alkaloids	Plumerane	151900	195060	160250	252010	181380	200730	C08493	--
pme0295	145.074	C6H11NO3	4-Acetamidobutyric acid	Organic acids	Organic acids	350000	370970	420200	2925200	1566000	2777800	C02946	ko00330,ko01100
Lmqp000427	145.074	C6H11NO3	N-Methyl-Trans-4-Hydroxy-L-Proline	Amino acids and derivatives	Amino acids and derivatives	31354	45673	45690	66060	99234	55357	--	--
mws0567	145.085	C5H11N3O2	4-Guanidinobutyric acid	Organic acids	Organic acids	876940	1027000	1096900	8185000	7283100	7241700	C01035	ko00330,ko01100
pme2380	146.022	C5H6O5	α-Ketoglutaric acid	Organic acids	Organic acids	341060	344980	420780	734430	370170	452940	C00026	ko00020,ko00040,ko00053,ko00220,ko00250,ko00300,ko00310,ko00340,ko00430,ko00630,ko00650,ko00660,ko01100,ko01110,ko01200,ko01210,ko01230,ko01240
mws0208	146.058	C6H10O4	Adipic Acid	Organic acids	Organic acids	692070	734620	700850	486710	555130	636940	C06104	ko01100
Wmzn000227	146.058	C6H10O4	2,2-Dimethylsuccinic acid	Organic acids	Organic acids	35121	64858	91880	91105	66608	79837	--	--
mws0924	146.058	C6H10O4	2-Methylglutaric acid	Organic acids	Organic acids	692070	734620	700850	486710	555130	636940	--	--
pme0193	146.069	C5H10N2O3	L-Glutamine	Amino acids and derivatives	Amino acids and derivatives	11037000	9694200	8678500	5018500	4465700	5451900	C00064	ko00220,ko00230,ko00240,ko00250,ko00630,ko00750,ko00910,ko00970,ko01100,ko01230,ko01240,ko02010
pme0026	146.106	C6H14N2O2	L-(+)-Lysine	Amino acids and derivatives	Amino acids and derivatives	15313000	11997000	12814000	7411400	6058500	7049900	C00047	ko00300,ko00310,ko00780,ko00960,ko00970,ko01100,ko01110,ko01210,ko01230,ko02010
pme0014	147.053	C5H9NO4	L-Glutamic acid	Amino acids and derivatives	Amino acids and derivatives	18277000	17798000	22261000	59882000	63000000	65107000	C00025	ko00220,ko00250,ko00330,ko00332,ko00340,ko00430,ko00480,ko00524,ko00630,ko00650,ko00660,ko00860,ko00910,ko00970,ko01100,ko01110,ko01200,ko01210,ko01230,ko01240,ko02010
mws1050	147.053	C5H9NO4	O-Acetylserine	Amino acids and derivatives	Amino acids and derivatives	1070600	1010800	937120	813470	521320	721720	C00979	ko00270,ko00908,ko00920,ko01100,ko01110,ko01200,ko01230,ko04122
Zmzn000113	147.053	C5H9NO4	L-threo-3-Methylaspartate	Amino acids and derivatives	Amino acids and derivatives	671400	623150	591310	2102500	2232100	2638700	C03618	ko00630,ko00660,ko01100,ko01200
Zmsp000366	147.09	C6H13NO3	Fagomine	Alkaloids	Piperidine alkaloids	54843	53613	83631	94551	93743	86266	C10144	--
MWSmce608	147.17	C6H13NO3	4-Hydroxyisoleucine	Amino acids and derivatives	Amino acids and derivatives	145940	148010	417430	312250	582880	370760	--	--
pmb2826	148	C5H8O5	Citramalate	Organic acids	Organic acids	212990	302220	316890	193800	330750	226550	C00815	--
Zmyn000230	148.037	C5H8O5	2-Dehydro-3-deoxy-L-arabinonate	Others	Saccharides and Alcohols	145420	40835	127170	193020	235880	130640	C00684	ko00053,ko01100
MWS3036	148.037	C5H8O5	3-Hydroxyglutaric acid	Organic acids	Organic acids	97761	522830	569910	425580	388770	356210	--	--
Lmbn000216	148.037	C5H8O5	3-Methylmalic acid	Organic acids	Organic acids	181200	191940	169430	196690	243270	143440	C06032	ko00290,ko00660,ko01100,ko01210,ko01230
Zmyn000247	148.037	C5H8O5	2-Hydroxyglutaric Acid	Organic acids	Organic acids	113910	48766	152540	274930	284980	217170	C03196	ko00310,ko01100
ML10171848	148.037	C5H8O5	D-Arabinono-1,4-lactone	Others	Saccharides and Alcohols	237740	664960	899310	631080	775430	357310	C00652	ko00053
mws2213	148.052	C9H8O2	Cinnamic acid	Phenolic acids	Phenolic acids	2692.4	2356.3	3866.4	18513	22858	12471	C00423	ko00130,ko00360,ko00940,ko00998,ko01100,ko01110
mws1024	148.052	C9H8O2	p-Coumaraldehyde	Phenolic acids	Phenolic acids	23355	21819	12164	20032	20053	10320	C05608	ko00940,ko01100,ko01110
Lmgp000796	149.048	C8H7NO2	4-Hydroxymandelonitrile	Alkaloids	Phenolamine	29278000	32358000	29581000	12747000	6774800	9996900	C00650	--
pme1210	149.051	C5H11NO2S	L-Methionine	Amino acids and derivatives	Amino acids and derivatives	28896000	28601000	28047000	11500000	5960000	8512900	C00073	ko00270,ko00966,ko00970,ko01100,ko01110,ko01210,ko01230,ko01240
mws0847	149.07	C6H7N5	1-Methyladenine	Nucleotides and derivatives	Nucleotides and derivatives	671040	536380	579480	203200	123830	221830	C02216	--
mws1499	150.053	C5H10O5	D-(-)-Arabinose*	Others	Saccharides and Alcohols	206770	201060	197780	458240	152270	355760	--	--
Zmgn000173	150.053	C5H10O5	D-Ribose*	Others	Saccharides and Alcohols	27638	53352	51766	647130	386820	445750	C00121	ko00030,ko01100,ko02010
mws0921	150.068	C9H10O2	p-Coumaryl alcohol	Phenolic acids	Phenolic acids	4667600	5221700	6319100	2558300	1622700	787010	C02646	ko00940,ko01100,ko01110
pmf0420	150.068	C9H10O2	Benzyl acetate	Organic acids	Organic acids	1130700	1125200	1293500	1359100	815590	843080	C15513	--
MWSmce199	150.13	C5H10O5	L-Xylose*	Others	Saccharides and Alcohols	233830	253880	223160	578650	203240	385350	C01510	--
MWSmce283	150.17	C9H10O2	Paroxypropione	Phenolic acids	Phenolic acids	76490	84041	77638	9538.5	8867.7	6405.3	C13342	--
pme1109	151.049	C5H5N5O	Guanine	Nucleotides and derivatives	Nucleotides and derivatives	307730	356270	422470	645390	944220	512070	C00242	ko00230,ko01100
pme0256	152.033	C5H4N4O2	Xanthine	Nucleotides and derivatives	Nucleotides and derivatives	2488100	2452600	2062100	3887500	698860	6508700	C00385	ko00230,ko00232,ko01100,ko01110
MWS2984	152.045	C4H4N6O	8-Azaguanine	Nucleotides and derivatives	Nucleotides and derivatives	309290	361810	396240	445130	215850	1073800	--	--
mws0182	152.047	C8H8O3	p-Hydroxyphenyl acetic acid	Phenolic acids	Phenolic acids	203810	161960	150090	222720	72104	48967	C00642	ko00350,ko00360,ko01100
Zmgn004894	152.047	C8H8O3	Methyl 4-hydroxybenzoate	Organic acids	Organic acids	280350	160880	168090	83141	77457	65379	--	--
mws0458	152.047	C8H8O3	Vanillin	Phenolic acids	Phenolic acids	2768300	1730200	1778600	856530	872970	633960	C00755	ko00998,ko01100,ko01110
pme2362	152.047	C8H8O3	Mandelic acid	Phenolic acids	Phenolic acids	12513	24503	17666	39184	34045	40844	C01984	--
MWS1962	152.12	C10H16O	cis-Citral	Organic acids	Organic acids	30406	31207	38612	43683	64792	55944	C09847	ko01110
MWSmce040	152.15	C8H8O3	Isovanillin	Phenolic acids	Phenolic acids	502460	277680	311400	193550	263320	179990	--	--
mws0444	153.043	C7H7NO3	3-Aminosalicylic acid	Phenolic acids	Phenolic acids	42621	41574	46348	52236	33446	80459	--	--
Hmlp000935	153.078	C8H11NO2	Vanillylamine	Alkaloids	Phenolamine	8207	16674	15520	24358	10645	60889	C16666	ko00998,ko01100,ko01110
mws0183	154.027	C7H6O4	Protocatechuic acid*	Phenolic acids	Phenolic acids	396280	359740	449760	797840	2047200	842400	C00230	ko01100,ko01110
mws0639	154.027	C7H6O4	2,3-Dihydroxybenzoic Acid*	Phenolic acids	Phenolic acids	316110	253190	361630	795640	2206600	1018800	C00196	ko01110
mws0180	154.027	C7H6O4	2,5-Dihydroxybenzoic Acid; Gentisic Acid*	Phenolic acids	Phenolic acids	158250	95468	184420	461910	1135300	634730	C00628	ko00350,ko01100
MWSslk102	154.56	C5H3ClN4	6-Chloropurine	Nucleotides and derivatives	Nucleotides and derivatives	20220	13939	12734	13223	16491	11591	--	--
mws0254	155.069	C6H9N3O2	L-Histidine	Amino acids and derivatives	Amino acids and derivatives	4673500	4358900	3967900	4344000	2354800	4137800	C00135	ko00340,ko00410,ko00970,ko01100,ko01110,ko01230,ko02010
pme2165	156.017	C5H4N2O4	Orotic acid	Others	Vitamin	51845	39670	37314	55897	56200	52141	C00295	ko00240,ko01100,ko01240
pmb0819	156.069	C10H8N2	3-Indoleacetonitrile	Alkaloids	Plumerane	177210	179830	188730	54556	8433.7	19390	C02938	ko00380,ko01100
MWS1837	157.11	C8H15NO2	TranexamicAcid	Organic acids	Organic acids	46486	38283	49121	102720	149920	148520	--	--
pmf0174	158.167	C10H22O	1-Decanol	Others	Saccharides and Alcohols	5003900	5643100	5082500	6261500	5563000	5129100	C01633	--
Lmbn001467	159.09	C7H13NO3	5-Acetamidopentanoic Acid	Organic acids	Organic acids	14433	29395	18813	146650	78981	182400	C03087	ko00310,ko01100
pme2589	160.037	C6H8O5	2-Oxoadipic acid	Organic acids	Organic acids	211020	269570	198450	9	9	9	C00322	ko00300,ko00310,ko00380,ko01100,ko01110,ko01210,ko01230,ko01240
Zmjn001813	160.074	C7H12O4	Pimelic acid	Organic acids	Organic acids	104150	183480	145610	28287	10643	21979	C02656	ko00780,ko01100,ko01240
Lmbn002072	160.074	C7H12O4	2-Propylsuccinic acid	Organic acids	Organic acids	72794	109750	103610	19700	1141.3	13528	C16657	--
mws0005	160.1	C10H12N2	Tryptamine	Alkaloids	Plumerane	168750	238320	359330	360510	342790	260790	C00398	ko00380,ko00901,ko01100,ko01110
mws0102	161.048	C9H7NO2	Indole-5-carboxylic acid	Alkaloids	Plumerane	35961	45272	35885	67259	20278	48735	--	--
mws1417	161.048	C9H7NO2	Indole-3-carboxylic acid	Alkaloids	Plumerane	86858	104200	86082	125040	39067	93736	--	--
mws1550	161.051	C6H11NO2S	S-Allyl-L-cysteine	Amino acids and derivatives	Amino acids and derivatives	1048100	1084500	949160	477580	48891	103510	C16759	--
Lmbp102601	162.032	C9H6O3	7-Hydroxycoumarin	Lignans and Coumarins	Coumarins	9	9	16714	251170	876550	532210	C09315	ko00940,ko01110
MWS0559	162.053	C6H10O5	1,6-anhydro-β-D-glucose	Others	Saccharides and Alcohols	545800	540840	452350	680600	154840	610380	--	--
pme2914	162.053	C6H10O5	3-Hydroxy-3-methylpentane-1,5-dioic acid	Amino acids and derivatives	Amino acids and derivatives	807880	1550400	1095300	6173500	8066500	12051000	C03761	--
Lmqp008175	162.068	C10H10O2	Methyl cinnamate	Phenolic acids	Phenolic acids	9	9	9	56007	81196	62296	C06358	--
pmf0440	162.068	C10H10O2	4-Methoxycinnamaldehyde	Phenolic acids	Phenolic acids	101840	99371	87047	104860	90239	99375	C10475	--
Lmbp000123	163.067	C6H13NO2S	L-Homomethionine	Amino acids and derivatives	Amino acids and derivatives	4674400	3774100	4428900	502370	241490	328420	C17213	ko00966,ko01110,ko01210
pme1419	163.067	C6H13NO2S	Methionine methyl ester	Amino acids and derivatives	Amino acids and derivatives	95466	107780	113350	193700	248120	188190	--	--
Lmbn002648	164.047	C9H8O3	α-Hydroxycinnamic acid	Phenolic acids	Phenolic acids	165740	54599	137880	366380	1219700	790750	C02763	ko00360,ko01100
pme1439	164.047	C9H8O3	p-Coumaric acid	Phenolic acids	Phenolic acids	25392	12481	25649	73343	196160	137070	C00811	ko00130,ko00350,ko00940,ko00950,ko00998,ko01100,ko01110
mws0159	164.047	C9H8O3	Phenylpyruvic acid	Organic acids	Organic acids	46233	65441	70602	117180	30961	80356	C00166	ko00360,ko00400,ko00960,ko01100,ko01110,ko01210,ko01230
MWSCX015	164.047	C9H8O3	Caffeic aldehyde	Phenolic acids	Phenolic acids	88541	73753	71334	207380	403310	325500	C10945	ko00940,ko01110
MWSCX017	164.047	C9H8O3	4-hydroxyphenyl acrylaldehyde	Others	Others	30373	27204	28958	98251	311070	171460	--	--
pme2529	164.069	C6H12O5	1,5-Anhydro-D-glucitol	Others	Saccharides and Alcohols	51642	74206	18182	297300	1468100	605920	C07326	--
pme3083	165.043	C8H7NO3	2-(Formylamino)benzoic Acid	Phenolic acids	Phenolic acids	81259	81720	93375	139630	329920	257780	C05653	ko00380,ko01100
pme2617	165.046	C5H11NO3S	Methionine sulfoxide	Amino acids and derivatives	Amino acids and derivatives	761220	1117500	995420	866550	902160	880530	--	--
MWS4525	165.065	C6H7N5O	6-O-methylguanine	Nucleotides and derivatives	Nucleotides and derivatives	50980	24109	49056	99128	56657	91461	--	--
pme0021	165.07	C9H11NO2	L-Phenylalanine	Amino acids and derivatives	Amino acids and derivatives	51212000	63769000	59818000	27890000	24561000	18851000	C00079	ko00360,ko00400,ko00460,ko00940,ko00960,ko00966,ko00970,ko00998,ko01100,ko01110,ko01210,ko01230,ko02010
pme0281	166.027	C8H6O4	Terephthalic acid	Phenolic acids	Phenolic acids	3890400	4775800	3090900	2149900	1623100	2017700	C06337	ko01100
mws0344	166.048	C5H10O6	D-Xylonic acid	Others	Saccharides and Alcohols	770440	1137700	1135600	760120	836780	923250	C00502	ko00040,ko01100
MWS1839	166.063	C9H10O3	Ethylparaben	Phenolic acids	Phenolic acids	65425	66911	63347	37672	41566	31041	--	--
mws0467	166.063	C9H10O3	3-(4-Hydroxyphenyl)-propionic acid	Phenolic acids	Phenolic acids	35036	57639	44355	22861	44176	29921	C01744	--
Lmrn003000	166.063	C9H10O3	2-Hydroxy-3-phenylpropanoic acid	Phenolic acids	Phenolic acids	14232	29168	25059	4349.9	12130	5652.2	C05607	ko00360,ko00960,ko01100
Lmgp002595	166.063	C9H10O3	4'-Hydroxy-3'-methoxyacetophenone (Acetovanillone)	Phenolic acids	Phenolic acids	9	9	9	451660	434580	416620	C11380	--
MWSmce165	166.084	C6H14O5	L-Fucitol	Others	Saccharides and Alcohols	79849	92359	117550	82830	38067	45746	--	--
Lmdp003146	166.099	C10H14O2	Rhododendrol	Phenolic acids	Phenolic acids	186800	298450	295700	172530	65996	209820	--	--
pmn001681	166.099	C10H14O2	1-(4-Methoxyphenyl)-1-propanol	Phenolic acids	Phenolic acids	205220	152500	168740	198010	95646	146140	--	--
pmc0274	166.1	C6H6N4S	6-Methylmercaptopurine	Nucleotides and derivatives	Nucleotides and derivatives	67194000	83890000	77870000	43965000	38744000	30579000	C16614	--
MWSmce583	166.13	C8H6O4	Piperonylic acid	Organic acids	Organic acids	1039800	1024000	1145000	737850	499360	516470	--	--
Zmjp000624	167.058	C8H9NO3	Pyridoxal	Others	Vitamin	80017	92281	85754	500110	215400	354530	C00250	ko00750,ko01100,ko01240
NK10253223	167.058	C8H9NO3	2-Amino-3-methoxybenzoic Acid	Phenolic acids	Phenolic acids	113440	91071	102710	441900	280690	337890	C05831	ko00380
Hmtp000776	167.059	C8H9NO3	4,5,6-Trihydroxy-2-cyclohexen-1-ylideneacetonitrile	Alkaloids	Alkaloids	1174800	1868300	1754100	551940	736200	587320	--	--
mws2125	167.982	C3H5O6P	Phosphoenolpyruvate	Organic acids	Organic acids	314460	272680	384580	396660	206790	295840	C00074	ko00010,ko00020,ko00400,ko00440,ko00620,ko00710,ko00998,ko01100,ko01110,ko01200,ko01230,ko01240
Cmdn000784	168.028	C5H4N4O3	Uric acid	Nucleotides and derivatives	Nucleotides and derivatives	1337300	958480	946520	15586	4194.6	12492	--	--
mws0028	168.042	C8H8O4	Vanillic acid	Phenolic acids	Phenolic acids	102820	66392	141750	33426	22149	16592	C06672	--
Lmmp003042	168.042	C8H8O4	Protocatechuic Acid Methyl Ester	Phenolic acids	Phenolic acids	38144	73186	121360	427200	218580	296890	--	--
Zmsp001834	168.042	C8H8O4	2,6-Dimethoxy-1,4-benzoquinone	Quinones	Quinones	627060	575950	796050	687790	1068200	752860	--	--
MWStz091	168.2	C8H12N2O2	Cyclo(L-Ala-L-Pro)	Amino acids and derivatives	Amino acids and derivatives	626080	633270	513280	105140	46513	83819	--	--
pme1383	169.074	C8H11NO3	Pyridoxine	Others	Vitamin	2702600	2914600	3337000	13294000	10851000	12149000	C00314	ko00750,ko01100,ko01240
pme0181	169.085	C7H11N3O2	1-Methylhistidine	Amino acids and derivatives	Amino acids and derivatives	227880	226630	241430	163790	267950	217030	C01152	ko00340,ko01100
Zmzn000078	169.998	C3H7O6P	Dihydroxyacetone phosphate	Others	Saccharides and Alcohols	414400	554740	567980	616870	569820	866110	C00111	ko00010,ko00040,ko00051,ko00052,ko00561,ko00562,ko00564,ko00640,ko00710,ko00760,ko01100,ko01110,ko01200,ko01230
pme3186	169.998	C3H7O6P	DL-Glyceraldehyde-3-phosphate	Organic acids	Organic acids	137670	186960	181460	172020	92170	197310	C00661	--
Lmrj002261	170.105	C8H14N2O2	Cyclo(Val-Ala)	Amino acids and derivatives	Amino acids and derivatives	185410	155740	143370	83939	95428	91686	--	--
MWSmce609	171.16	C4H5CaNO4	Aspartic acid (calcium)	Amino acids and derivatives	Amino acids and derivatives	700010	687750	769000	1300400	1497800	1276700	--	--
Lmbn003524	172.11	C9H16O3	9-Oxononanoic acid	Organic acids	Organic acids	36886	45236	31166	13221	9245.5	9561	C16322	ko00592,ko01110
pme0253	173.105	C8H15NO3	N-Acetyl-L-leucine	Amino acids and derivatives	Amino acids and derivatives	51590	39379	53658	458130	313420	335160	C02710	--
pme2550	174.016	C6H6O6	Cis-Aconitic acid	Organic acids	Organic acids	19024	28163	40023	1277600	4289200	1877900	C00417	ko00020,ko00630,ko00660,ko01100,ko01110,ko01210
MA10039492	174.016	C6H6O6	Dehydroascorbic acid	Others	Vitamin	9	9	9	765490	859560	766220	C05422	ko00053,ko00480,ko01100
mws0154	174.053	C7H10O5	Shikimic acid	Organic acids	Organic acids	63408	78147	94533	3593600	9898600	5224600	C00493	ko00400,ko01100,ko01110,ko01230,ko01240
MWS4471	174.064	C6H10N2O4	N-Alpha-Acetyl-L-Asparagine	Amino acids and derivatives	Amino acids and derivatives	4269.2	6795.6	9644.1	129480	380680	218750	--	--
mws0242	174.089	C8H14O4	SubericAcid	Organic acids	Organic acids	65522	65448	54846	10653	16357	14282	C08278	--
mws1401	174.1	C7H14N2O3	L-theanine	Amino acids and derivatives	Amino acids and derivatives	6760300	3658500	5168300	729940	143890	988050	C01047	--
mws0260	174.112	C6H14N4O2	L-(+)-Arginine	Amino acids and derivatives	Amino acids and derivatives	22514000	13878000	17857000	55048000	140150000	104380000	C00062	ko00220,ko00261,ko00330,ko00472,ko00970,ko01100,ko01110,ko01230,ko02010
pme1651	175.063	C10H9NO2	Indole 3-acetic acid (IAA)	Alkaloids	Plumerane	132080	61081	87757	9	9	9	C00954	ko00380,ko01100,ko04075
pme0008	175.096	C6H13N3O3	L-Citrulline	Amino acids and derivatives	Amino acids and derivatives	250130	254040	224500	745900	1807900	1241200	C00327	ko00220,ko01100,ko01110,ko01230
HJN007	176.032	C6H8O6	ascorbic acid	Others	Vitamin	20281	26625	42115	9	9	9	C00072	ko00053,ko00480,ko01100,ko01110,ko01240
pmb3101	176.068	C7H12O5	2-Isopropylmalic Acid	Organic acids	Organic acids	1242900	1386400	1377300	24136000	3747700	7866600	C02504	ko00290,ko00620,ko01100,ko01110,ko01210,ko01230
Zmgn001448	176.068	C7H12O5	2-Propylmalic Acid	Organic acids	Organic acids	1880800	2189500	1410800	22489000	3816100	10244000	C05994	ko00620
pmf0367	178.027	C9H6O4	5,7-Dihydroxychromone	Others	Others	9	9	9	123590	48175	69455	C09001	--
mws0875	178.041	C5H10N2O3S	Cys-Gly	Amino acids and derivatives	Amino acids and derivatives	9	9	9	62348	59886	52738	C01419	ko00480,ko01100
pmf0284	178.063	C10H10O3	Riboprine	Phenolic acids	Phenolic acids	724290	362520	383340	843990	1164100	573640	C16427	ko00908,ko01110
mws1200	178.063	C10H10O3	Trans-4-Hydroxycinnamic Acid Methyl Ester	Phenolic acids	Phenolic acids	9	9	9	296540	219210	200440	--	--
pmb2795	178.063	C10H10O3	4-Methoxycinnamic acid	Phenolic acids	Phenolic acids	9	9	9	211020	172680	145120	--	--
pmb0786	179	C6H13NO5	Glucosamine*	Others	Saccharides and Alcohols	1750400	1732300	1961000	2300100	2789300	2680300	C00329	ko00520,ko01100
mws2212	180.042	C9H8O4	Caffeic acid	Phenolic acids	Phenolic acids	14944	28304	86364	192990	383520	223080	C01197	ko00940,ko01100,ko01110
pmf0139	180.063	C6H12O6	D-Galactose*	Others	Saccharides and Alcohols	6987600	8372700	6006200	9234600	2450400	8131800	C00124	ko00052,ko01100
pme0516	180.063	C6H12O6	Inositol*	Others	Saccharides and Alcohols	960330	726470	895250	1460600	1390400	1414900	C00137	ko00052,ko00053,ko00562,ko01100,ko01110,ko02010,ko04070
mws4170	180.063	C6H12O6	D-Glucose*	Others	Saccharides and Alcohols	19338000	18473000	19675000	23508000	4891400	19481000	C00031	ko00010,ko00030,ko00052,ko00500,ko00520,ko00524,ko00901,ko01100,ko01110,ko02010
pmf0138	180.063	C6H12O6	D-Mannose*	Others	Saccharides and Alcohols	16122000	17449000	14720000	24656000	4975600	21807000	C00159	ko00051,ko00052,ko00520,ko01100,ko02010
Lmbn004847	180.079	C10H12O3	4-Methoxyphenylpropionic acid	Phenolic acids	Phenolic acids	490340	267020	516710	284050	266640	145860	--	--
mws0093	180.079	C10H12O3	Coniferyl alcohol	Phenolic acids	Phenolic acids	1702100	1045000	1714100	1016700	1107700	440230	C00590	ko00940,ko00998,ko01100,ko01110
Hmcp009963	180.138	C11H18NO+	Candicine	Alkaloids	Phenolamine	660500	535280	728220	1397100	2099400	1214100	C10575	--
mws0250	181.074	C9H11NO3	L-(-)-Tyrosine	Amino acids and derivatives	Amino acids and derivatives	4742800	6431100	6766900	4625700	2554400	3387400	C00082	ko00130,ko00261,ko00350,ko00360,ko00400,ko00460,ko00730,ko00940,ko00950,ko00965,ko00966,ko00970,ko00998,ko01100,ko01110,ko01210,ko01230,ko01240
MWStz070	181.074	C9H11NO3	N-(2-Hydroxy-4-methoxyphenyl)acetamide	Alkaloids	Phenolamine	14739000	15726000	17134000	12360000	7440900	10210000	--	--
Hmtn001288	182.058	C9H10O4	Methyl-(2,4-dihydroxyphenyl)acetate	Phenolic acids	Phenolic acids	241530	280700	359290	31778	24974	21246	--	--
Lmrn001951	182.058	C9H10O4	(S)-2-Hydroxy-3-(4-Hydroxyphenyl)Propanoic Acid	Phenolic acids	Phenolic acids	358350	558430	551810	42989	31816	41347	--	--
MWS5206	182.058	C9H10O4	Hydroxyphenyllactic acid	Phenolic acids	Phenolic acids	370910	462690	473260	46653	30102	39737	C03672	--
mws0214	182.079	C6H14O6	D-Sorbitol*	Others	Saccharides and Alcohols	88863	82440	77410	165430	39549	146530	C00794	ko00051,ko00052,ko01100,ko02010
pme2237	182.079	C6H14O6	Dulcitol*	Others	Saccharides and Alcohols	9	9	9	47863	36198	52891	C01697	ko00052,ko01100
MWSmce455	182.17	C9H10O4	Methyl vanillate	Phenolic acids	Phenolic acids	22834	19183	21878	7152.9	16378	8141.8	--	--
MWSslk235	182.172	C6H14O6	Allitol*	Others	Saccharides and Alcohols	245420	219880	212750	344120	160310	245450	--	--
pme0309	184.037	C8H8O5	Methyl gallate	Phenolic acids	Phenolic acids	9	9	9	89456	307310	121150	C05616	--
HJN037	184.037	C8H8O5	4-O-Methylgallic Acid	Phenolic acids	Phenolic acids	9	9	9	277630	1096800	536490	--	--
Lmrj001341	184.086	C8H12N2O3	Cyclo(Ser-Pro)	Amino acids and derivatives	Amino acids and derivatives	2381100	2469700	2425600	751500	582550	682100	--	--
Wmmn002441	184.11	C10H16O3	(E)-linalool-1-oic acid	Lipids	Free fatty acids	4520.6	22222	32040	296310	1144200	607930	--	--
MWS1816	184.146	C11H20O2	10-Undecenoic acid	Lipids	Free fatty acids	45896	47556	48979	52834	52345	49305	C13910	--
Zmgn000447	185.993	C3H7O7P	3-Phospho-D-glyceric acid	Others	Saccharides and Alcohols	428110	503960	486670	788220	545460	814590	C00197	ko00010,ko00030,ko00260,ko00270,ko00561,ko00630,ko00710,ko01100,ko01110,ko01200,ko01230,ko01240
pme2732	186.068	C12H10O2	1-Naphthylacetic acid	Organic acids	Organic acids	40597	54816	47616	9	9	9	C13014	--
mws0752	186.162	C11H22O2	Undecylic Acid	Lipids	Free fatty acids	1252000	1137600	1108000	1287500	1301100	1313300	--	--
Hmmp001310	187.063	C11H9NO2	3-Indoleacrylic acid	Alkaloids	Plumerane	28030000	32889000	31104000	21605000	15954000	14742000	C21283	--
Hmgp002327	187.063	C11H9O2N	3-amino-2-naphthoic acid	Alkaloids	Alkaloids	31500000	34363000	33020000	25510000	16828000	16059000	--	--
pmn001492	188.041	C11H8O3	Ayapin	Lignans and Coumarins	Coumarins	121570	122800	127940	40858	56801	45517	C18078	--
pme0137	188.08	C7H12N2O4	N-α-Acetyl-L-glutamine	Amino acids and derivatives	Amino acids and derivatives	104930	80085	65488	195360	166200	273090	--	--
mws0237	188.105	C9H16O4	Anchoic Acid	Organic acids	Organic acids	954260	1200200	1207200	522040	433940	582440	C08261	--
pmn001380	188.105	C9H16O4	Eucommiol	Others	Others	32257	33935	19499	8861.5	9	11276	C17878	--
pme0122	188.116	C8H16N2O3	N6-Acetyl-L-lysine	Amino acids and derivatives	Amino acids and derivatives	8762000	9186700	7861000	1922600	1527100	1764200	C02727	ko00310,ko01100
mws0736	188.116	C8H16N2O3	N-Glycyl-L-leucine	Amino acids and derivatives	Amino acids and derivatives	630430	473060	585070	2521000	2398000	2037400	C02155	--
mws5041	188.116	C8H16N2O3	Glycylisoleucine	Amino acids and derivatives	Amino acids and derivatives	781110	406790	610470	2393900	2086800	1859500	--	--
pme3388	188.127	C7H16N4O2	H-HomoArg-OH	Amino acids and derivatives	Amino acids and derivatives	2551000	1526400	2155100	733910	1301300	1156600	C01924	--
Zmdp000292	188.127	C7H16N4O2	Arginine methyl ester	Amino acids and derivatives	Amino acids and derivatives	12374000	8014200	12678000	3960200	7618800	6949300	--	--
Zmjp000182	188.127	C7H16N4O2	N-Monomethyl-L-arginine	Amino acids and derivatives	Amino acids and derivatives	11898000	4629100	12714000	4106900	7154800	6766400	C03884	--
Zmzp000145	188.152	C9H20N2O2	Trimethyllysine	Amino acids and derivatives	Amino acids and derivatives	9	470320	505450	780320	708680	1063000	C03793	ko00310,ko01100
pme0075	189.064	C7H11NO5	N-Acetyl-L-glutamic acid	Amino acids and derivatives	Amino acids and derivatives	979190	1908000	1698400	1568000	2293900	1271900	C00624	ko00220,ko01100,ko01110,ko01210,ko01230
pme2244	189.07	C11H11NO2	3-Indolepropionic acid	Alkaloids	Plumerane	40469	52005	43340	41301	20943	22932	--	--
mws0193	189.111	C7H15N3O3	L-Homocitrulline	Amino acids and derivatives	Amino acids and derivatives	558900	444710	449070	149800	119700	84416	C02427	--
pme0278	190.095	C7H14N2O4	2,6-Diaminooimelic acid	Organic acids	Organic acids	225980	206830	221890	397990	535440	551860	C00666	ko00300,ko01100,ko01110,ko01230
pmb2561	191.1	C7H13NO3S	N-Acetylmethionine	Amino acids and derivatives	Amino acids and derivatives	9	10314	12841	20214	11148	9	C02712	--
mws0281	192.027	C6H8O7	Citric Acid	Organic acids	Organic acids	1099900	1980700	1969900	3259800	5466000	2199200	C00158	ko00020,ko00250,ko00630,ko01100,ko01110,ko01200,ko01210,ko01230,ko01240
Zmyn000453	192.027	C6H8O7	Isocitric Acid	Organic acids	Organic acids	6423000	6423000	8789000	15024000	25520000	19218000	C00311	ko00020,ko00630,ko01100,ko01110,ko01200,ko01210,ko01230,ko01240
MWSmce221	192.042	C10H8O4	5,7-Dihydroxy-4-methylcoumarin*	Lignans and Coumarins	Coumarins	9	9	9	244120	301200	412030	--	--
MWSslk135	192.042	C10H8O4	7,8-Dihydroxy-4-methylcoumarin*	Lignans and Coumarins	Coumarins	9	9	9	372830	316300	492010	--	--
pme2993	192.042	C10H8O4	Scopoletin(7-Hydroxy-5-methoxycoumarin)	Lignans and Coumarins	Coumarins	9	9	9	154930	144440	180020	C01752	ko00940,ko01110
mws0277	192.063	C7H12O6	Quinic Acid	Organic acids	Organic acids	12431000	14196000	16751000	34696000	52964000	40150000	C00296	ko00400,ko01100
MWS1933	193.074	C10H11NO3	N-(2-Methylbenzoyl)glycine	Amino acids and derivatives	Amino acids and derivatives	9	9	9	40803	21855	98784	--	--
mws1189	194.033	C6H10O7	D-Galacturonic acid*	Others	Saccharides and Alcohols	683090	320670	277430	150100	116520	149500	C00333	ko00040,ko00053,ko00520,ko01100,ko01240,ko02010
pme3705	194.043	C6H10O7	D-Glucoronic acid*	Others	Saccharides and Alcohols	613950	476890	389790	218200	172230	206820	C00191	ko00040,ko00053,ko00520,ko00562,ko01100,ko01240
pme0422	194.058	C10H10O4	Isoferulic Acid*	Phenolic acids	Phenolic acids	67130	26528	63215	66652	84395	91427	C10470	--
mws0014	194.058	C10H10O4	Ferulic acid*	Phenolic acids	Phenolic acids	66260	34259	23327	96265	97147	89404	C01494	ko00940,ko01100,ko01110
mws2104	194.079	C7H14O6	D-Pinitol	Others	Saccharides and Alcohols	10901	6609.1	7596.1	41010	53673	36619	C03844	--
pmp001235	194.131	C12H18O2	Cinidilide	Others	Others	39435	9219.2	24774	133880	130360	63860	--	--
MWS1771	195.09	C10H13NO3	L-Tyrosine methyl ester	Amino acids and derivatives	Amino acids and derivatives	173860	178800	201050	327230	256550	223290	C03404	--
pme0534	196.058	C6H12O7	Gluconic acid	Others	Saccharides and Alcohols	490090	450850	555950	331720	326300	595600	C00257	ko00030,ko01100,ko01110,ko01200
Lmrj002698	196.122	C10H16N2O2	Cyclo(Val-Pro)	Amino acids and derivatives	Amino acids and derivatives	1408700	1295700	1318000	232950	61279	170480	--	--
pme3827	197.069	C9H11NO4	3,4-Dihydroxy-DL-phenylalanine	Amino acids and derivatives	Amino acids and derivatives	59704	61047	98148	71472	83773	64146	C00355	ko00350,ko00950,ko00965,ko01100,ko01110
pmb2497	198.053	C9H10O5	4-Hydroxy-3-methoxymandelate	Phenolic acids	Phenolic acids	629880	759060	810170	252610	191040	190270	C05584	ko00350,ko01100
mws0923	199.04	C9H10ClNO2	L-2-chlorophenylalanine	Amino acids and derivatives	Amino acids and derivatives	15486000	15266000	14355000	14358000	14261000	13509000	--	--
Zmzn000079	200.009	C4H9O7P	D-Erythrose-4-phosphate	Others	Saccharides and Alcohols	75897	103420	125360	173590	66512	398330	C00279	ko00030,ko00400,ko00710,ko00750,ko00998,ko01100,ko01110,ko01200,ko01230,ko01240
pmb2640	200.178	C12H24O2	Lauric acid	Lipids	Free fatty acids	7534.2	5105.3	5161.1	8406.5	8615.8	9543.5	C02679	ko00061,ko01100,ko01110
mws5037	202.132	C9H18N2O3	Alanylleucine	Amino acids and derivatives	Amino acids and derivatives	192260	143580	149640	281760	169560	272480	--	--
NK10251888	202.143	C8H18N4O2	NG,NG-Dimethyl-L-arginine	Amino acids and derivatives	Amino acids and derivatives	8272700	5589500	7610400	28928000	32702000	34162000	C03626	--
MWS5164	202.143	C8H18N4O2	N,N'-Dimethylarginine;SDMA	Amino acids and derivatives	Amino acids and derivatives	8445000	5713200	6675200	27294000	15520000	33169000	--	--
pme0224	203.095	C12H13NO2	Indole-3-butyric acid	Alkaloids	Plumerane	15252	18193	14127	9	9	15013	C11284	--
mws0282	204.09	C11H12N2O2	L-Tryptophan	Amino acids and derivatives	Amino acids and derivatives	34727000	34519000	32715000	15409000	8667600	10998000	C00078	ko00260,ko00380,ko00400,ko00901,ko00966,ko00970,ko00998,ko01100,ko01110,ko01210,ko01230,ko01240
Zmbp002538	204.09	C11H12N2O2	1-Methoxy-indole-3-acetamide	Alkaloids	Plumerane	5527000	5829900	6627000	4299300	3197000	2582700	--	--
Zmtn001464	205.038	C10H7NO4	4,8-Dihydroxyquinoline-2-carboxylic acid	Organic acids	Organic acids	147560	147890	20728	30747	22282	14965	C02470	ko00380
pmb0818	205.074	C11H11NO3	Methoxyindoleacetic acid	Alkaloids	Plumerane	2660100	3206700	3093800	2311700	1676700	1668600	C05660	ko00380
Lmbn013410	206.167	C14H22O	2,4-Di-Tert-Butylphenol	Phenolic acids	Phenolic acids	124560	110210	120060	134950	105360	95980	--	--
Zmgn002106	207.09	C11H13NO3	N-Acetyl-L-phenylalanine	Amino acids and derivatives	Amino acids and derivatives	110540	166180	184390	423250	1017300	280890	C03519	ko00360,ko01100
MWSslk120	207.226	C11H13NO3	N-Acetyl-DL-phenylalanine	Amino acids and derivatives	Amino acids and derivatives	97907	170120	158410	371400	319430	207420	--	--
MA10107783	208.037	C10H8O5	3-[(1-Carboxyvinyl)oxy]benzoic acid	Phenolic acids	Phenolic acids	10374	19340	13176	304190	210990	172210	C20772	ko00130,ko01100,ko01110,ko01240
MWSmce332	208.074	C11H12O4	3,4-Dimethoxycinnamic acid	Phenolic acids	Phenolic acids	9	9	9	134900	74196	130520	--	--
mws1212	208.074	C11H12O4	Methyl ferulate	Phenolic acids	Phenolic acids	9	9	9	83116	42498	86190	--	--
Lmsn000954	208.095	C8H16O6	Dambonitol	Others	Saccharides and Alcohols	22406	40056	64039	689950	222920	665780	--	--
MWSslk124	208.21	C11H12O4	DL-Benzylsuccinic acid	Organic acids	Organic acids	9	9	9	25574	18339	28722	--	--
Zmpn000199	210.038	C6H10O8	D-Galactaric acid	Others	Saccharides and Alcohols	28606	66757	77409	82939	367920	207480	C00879	ko00053,ko01100
Zmyn000108	210.038	C6H10O8	D-Saccharic acid	Others	Saccharides and Alcohols	123860	110240	163700	378890	777180	717920	C00818	ko00053,ko01100
Hmcp003783	210.079	C13H10N2O	1-Acetyl-β-carboline	Alkaloids	Plumerane	675110	672640	838480	71777	42750	71173	--	--
Zmjp003163	210.126	C12H18O3	Jasmonic acid	Organic acids	Organic acids	9	9	9	238060	168010	269380	C08491	ko00592,ko01100,ko01110,ko04075
Lmhp002764	211.144	C11H18N2O2	Cyclo(Pro-Leu)	Amino acids and derivatives	Amino acids and derivatives	563280	512120	536950	115440	26255	110580	--	--
pmb2507	214.024	C5H11O7P	2-Deoxyribose-1-phosphate	Nucleotides and derivatives	Nucleotides and derivatives	101350	151650	221470	80240	9	84031	C00672	ko00030,ko00240,ko01100
mws0677	218.106	C12H14N2O2	N-Acetyl-5-hydroxytryptamine	Alkaloids	Plumerane	163880	203200	218830	345260	312890	316980	C00978	ko00380,ko01100,ko01110
Lmrj001698	218.127	C9H18N2O4	Ser-Ile	Amino acids and derivatives	Amino acids and derivatives	883530	963060	880790	1057100	1678300	1399200	--	--
mws1337	219.111	C9H17NO5	D-Pantothenic Acid	Others	Vitamin	4050400	3853500	4644900	4632400	4721500	4952700	C00864	ko00410,ko00770,ko01100,ko01110,ko01240
Hmyp002656	221.068	C11H11NO4	Methyl dioxindole-3-acetate	Alkaloids	Plumerane	199800	317130	397010	113960	95611	159150	--	--
mws2608	221.09	C8H15NO6	N-Acetyl-D-galactosamine*	Others	Saccharides and Alcohols	952030	922500	1078000	1102200	1606600	1625700	C01132	ko00052,ko01100
pme2755	221.09	C8H15NO6	N-Acetyl-D-glucosamine	Others	Saccharides and Alcohols	929690	1005200	1207300	1348700	1699900	1531000	C00140	ko00520,ko01100,ko02010
mws4174	221.09	C8H15NO6	N-Acetyl-β-D-mannosamine*	Others	Saccharides and Alcohols	58245	49150	68835	130610	70723	213790	--	--
MWSmce177	222.089	C12H14O4	Ethyl ferulate	Phenolic acids	Phenolic acids	16214	13011	16982	62096	11766	40464	--	--
MWS4296	222.1	C11H14N2O3	Glycylphenylalanine	Amino acids and derivatives	Amino acids and derivatives	863450	685390	763000	2450100	1873400	1793100	--	--
mws0520	223.084	C11H13NO4	N-Acetyl-L-tyrosine	Amino acids and derivatives	Amino acids and derivatives	63785	98362	76732	39625	24644	31169	--	--
mws1429	224.141	C13H20O3	Vomifoliol	Terpenoids	Monoterpenoids	9	9	9	80645	85444	104500	C04166	--
MWS2010	226.059	C9H10N2O5	3-nitro-L-tyrosine	Amino acids and derivatives	Amino acids and derivatives	9	9	9	17223	34373	22757	--	--
Lmyp003951	226.084	C11H14O5	3-Hydroxy-1-(4-hydroxy-3,5-dimethoxyphenyl)propan-1-one	Phenolic acids	Phenolic acids	9	25293	9095.9	26619	23191	36712	--	--
pme1194	227.091	C9H13N3O4	Deoxycytidine	Nucleotides and derivatives	Nucleotides and derivatives	15844000	12110000	9472900	659620	403550	589390	C00881	ko00240,ko01100,ko02010
pme3882	228.075	C9H12N2O5	2'-Deoxyuridine	Nucleotides and derivatives	Nucleotides and derivatives	53473	45191	58223	9	9	9	C00526	ko00240,ko01100,ko02010
mws0119	228.209	C14H28O2	Myristic Acid	Lipids	Free fatty acids	3630500	4215800	4562200	4286800	6243000	5940000	C06424	ko00061,ko01100
MWStz100	228.21	C8H12N4O4	5-Aza-2'-deoxycytidine	Nucleotides and derivatives	Nucleotides and derivatives	244350	319050	343950	35785	23875	26110	--	--
Lmhp001461	229.154	C11H20N2O3	Pro-Leu	Amino acids and derivatives	Amino acids and derivatives	505420	916440	476810	2662300	2532700	2496000	--	--
Lmhp001670	231.17	C11H22N2O3	Val-Leu	Amino acids and derivatives	Amino acids and derivatives	518110	426150	416340	1435800	1220200	1047900	--	--
Hmlp001371	234.1	C12H14N2O3	Cyclo(Tyr-Ala)	Amino acids and derivatives	Amino acids and derivatives	310510	284510	318590	84733	72018	85020	--	--
pmb0962	234.158	C10H22N2O4	Lysine butyrate	Amino acids and derivatives	Amino acids and derivatives	920630	1203100	1206400	743880	969070	1392800	--	--
pme1313	236.08	C11H12N2O4	N'-Formylkynurenine	Amino acids and derivatives	Amino acids and derivatives	344380	369980	293000	182170	49938	143400	C02700	ko00380,ko01100,ko01240
mws4176	236.116	C12H16N2O3	DL-Alanyl-DL-phenylalanine	Amino acids and derivatives	Amino acids and derivatives	160410	115730	151320	491440	414820	318710	--	--
mws0221	240.024	C6H12N2O4S2	L-(-)-Cystine	Amino acids and derivatives	Amino acids and derivatives	211450	66451	61017	121400	16458	72288	C00491	ko00270,ko01100,ko02010
mws0832	240.122	C10H16N4O3	2-(4-Aminobutanamido)-3-(1-methyl-1H-imidazol-5-yl)propanoic acid	Organic acids	Organic acids	43506	16597	10482	28647	4536.4	33667	C01262	ko00340,ko00410,ko01100
MWS0552	240.209	C15H28O2	Cis-10-Pentadecenoic Acid(C15: 1)	Lipids	Free fatty acids	653410	460350	493470	776170	616840	560940	--	--
pme2827	240.245	C16H32O	Palmitaldehyde	Lipids	Free fatty acids	82279000	75697000	74877000	78344000	70983000	76385000	C00517	ko00071
MWS2910	241.106	C10H15N3O4	5-Methyl-2'-deoxycytidine	Nucleotides and derivatives	Nucleotides and derivatives	1070700	724410	871310	14528	31959	32835	C03592	--
mws1383	242.08	C12H10N4O2	Lumichrome	Alkaloids	Alkaloids	52266	44099	45596	31174	22789	32774	C01727	ko00740
pme0264	242.09	C10H14N2O5	Thymidine	Nucleotides and derivatives	Nucleotides and derivatives	8796200	6043800	6705900	327820	129270	309440	C00214	ko00240,ko01100
mws0359	242.225	C15H30O2	Pentadecanoic Acid	Lipids	Free fatty acids	80780	63492	65710	46764	44903	42659	C16537	--
MWS2430	242.225	C15H30O2	13-methylmyristic acid	Lipids	Free fatty acids	45053	58195	53709	74502	63110	58729	--	--
ML10180524	243.086	C9H13N3O5	Cytarabine	Nucleotides and derivatives	Nucleotides and derivatives	2426300	5541500	8067700	1303500	363200	1781800	C02961	--
pme3732	243.086	C9H13N3O5	Cytidine	Nucleotides and derivatives	Nucleotides and derivatives	18216000	13647000	16353000	5143800	2313200	1339000	C00475	ko00240,ko01100,ko02010
mws0248	244.07	C9H12N2O6	Uridine	Nucleotides and derivatives	Nucleotides and derivatives	391050	315850	403890	245280	109760	134170	C00299	ko00240,ko01100,ko02010
mws0976	244.07	C9H12N2O6	β-Pseudouridine	Nucleotides and derivatives	Nucleotides and derivatives	167850	203840	172580	180900	68236	59585	C02067	ko00240,ko01100
MWSmce295	244.07	C9H12N2O6	1-beta-D-Arabinofuranosyluracil	Nucleotides and derivatives	Nucleotides and derivatives	990860	739350	1082700	350750	92576	70925	C16908	--
pme2266	244.088	C10H16N2O3S	Biotin	Others	Vitamin	156130	125550	160850	189220	124770	111710	C00120	ko00780,ko01100,ko01240,ko02010
MWS5231	244.167	C13H24O4	Tridecanedioic acid	Lipids	Free fatty acids	61369	46211	65147	55996	45442	50999	--	--
Lmhp003064	245.128	C14H16N2O2	Cyclo(Pro-Phe)	Amino acids and derivatives	Amino acids and derivatives	189040	158430	100040	52738	34375	39183	--	--
Lmhp002031	245.186	C12H24N2O3	Leu- Leu	Amino acids and derivatives	Amino acids and derivatives	322190	275400	295090	1224800	776630	789920	--	--
Lmrj002087	246.121	C10H18N2O5	Ile-Asp	Amino acids and derivatives	Amino acids and derivatives	7864600	8257900	7934700	5021300	3993500	3502000	--	--
Zmdp001647	246.122	C10H18N2O5	γ-Glutamyl-L-valine	Amino acids and derivatives	Amino acids and derivatives	439080	565400	523440	1304000	115470	1080300	--	--
pme2563	250.062	C8H14N2O5S	γ-Glu-Cys	Amino acids and derivatives	Amino acids and derivatives	30735	28770	33871	15707	15586	11203	C00669	ko00480,ko01100,ko01240
pme3961	251.102	C10H13N5O3	Deoxyadenosine	Nucleotides and derivatives	Nucleotides and derivatives	3190100	1414800	1793000	679580	610350	521650	C00559	ko00230,ko01100,ko02010
pme2776	252.086	C10H12N4O4	2'-Deoxyinosine	Nucleotides and derivatives	Nucleotides and derivatives	194530	102950	117230	11497	44062	11948	C05512	ko00230,ko01100,ko02010
pma3101	256.082	C11H14NO6+	Nicotinate D-ribonucleoside	Others	Vitamin	66918	94723	134920	222120	198370	192160	C05841	ko00760,ko01100
pmn001578	256.24	C16H32O2	Palmitic acid	Lipids	Free fatty acids	16799000	18374000	17291000	10367000	11930000	15313000	C00249	ko00061,ko00062,ko00071,ko00073,ko01040,ko01100,ko01212
mws0120	257.103	C8H20NO6P	Choline alfoscerate	Lipids	PC	62705	81906	73878	26964	3362.7	91295	C00670	ko00564,ko00565
pme1187	258.085	C10H14N2O6	5-Methyluridine	Nucleotides and derivatives	Nucleotides and derivatives	179640	141400	157560	160070	35610	92472	--	--
MWSslk133	258.183	C14H26O4	1,14-Tetradecanedioic Acid	Lipids	Free fatty acids	24845	13824	19227	12938	16633	21623	--	--
Zmyn000110	259.046	C6H14NO8P	D-Glucosamine 1-phosphate	Others	Saccharides and Alcohols	5694.1	3313.9	2841.7	8515.5	3294.3	7547.5	C06156	ko00520,ko01100
pme3313	260.03	C6H13O9P	D-Fructose 6-phosphate*	Others	Saccharides and Alcohols	595880	742750	683320	568470	436670	1000100	C00085	ko00052,ko00500,ko00710,ko01100,ko01110,ko01200
mws1090	260.03	C6H13O9P	Glucose-1-phosphate*	Others	Saccharides and Alcohols	5194000	7145200	5802200	6444000	4144800	9027500	C00103	ko00010,ko00040,ko00052,ko00500,ko00520,ko00523,ko00561,ko01100,ko01110,ko01240
mws0866	260.03	C6H13O9P	D-Glucose 6-phosphate*	Others	Saccharides and Alcohols	5860600	6728500	6037800	7108400	3840200	8496500	C00092	ko00500,ko00524,ko00562,ko00998,ko01100,ko01110
Zmdp002216	260.137	C11H20N2O5	L-γ-Glutamyl-L-leucine	Amino acids and derivatives	Amino acids and derivatives	519610	622580	636050	1197200	381520	651420	--	--
Hmlp002558	260.152	C15H20N2O2	Cyclo(Tyr-Leu)	Amino acids and derivatives	Amino acids and derivatives	370000	366530	385160	185910	77036	132310	--	--
MWStz211	260.3	C14H16N2O3	Cyclo(L-Phe-trans-4-hydroxy-L-Pro)	Amino acids and derivatives	Amino acids and derivatives	209870	184430	121890	22429	10702	13638	--	--
MWS4309	261.111	C13H15N3O3	Glycyl-tryptophan	Amino acids and derivatives	Amino acids and derivatives	176500	136720	156830	582410	512940	429330	--	--
Zmpn000095	262.045	C6H15O9P	Sorbitol-6-phosphate	Others	Saccharides and Alcohols	33921	54196	47021	37122	25752	59506	C01096	ko00051,ko01100
Lmhp001732	263.139	C14H18N2O3	Pro-Phe	Amino acids and derivatives	Amino acids and derivatives	181620	156860	137030	1002100	674850	513860	--	--
Lmtn004049	264.136	C15H20O4	Abscisic acid	Organic acids	Organic acids	21250	22909	23208	200130	662100	153750	C06082	ko00906,ko01100,ko01110,ko04075
Lmhp002001	265.155	C14H20N2O3	Val-Phe	Amino acids and derivatives	Amino acids and derivatives	218300	181340	208740	1132100	697030	790170	--	--
Hmsn000210	266.224	C17H30O2	Methyl 7,10-hexadecadienoate	Lipids	Free fatty acids	6882000	5017500	4870400	7234800	9	6104500	--	--
Zmjp000966	267.097	C10H13N5O4	Vidarabine	Others	Others	32528000	31131000	39930000	55026000	45444000	29431000	--	--
HJAP105	267.097	C10H13N5O4	adenine nucleoside	Nucleotides and derivatives	Nucleotides and derivatives	33451000	31339000	42651000	57934000	47639000	27260000	--	--
pme1184	267.097	C10H13N5O4	Deoxyguanosine	Nucleotides and derivatives	Nucleotides and derivatives	2737400	1838800	2271400	4670000	2332700	4220100	C00330	ko00230,ko01100,ko02010
pme0230	267.097	C10H13N5O4	Adenosine	Nucleotides and derivatives	Nucleotides and derivatives	35180000	31395000	39293000	57268000	48953000	28461000	C00212	ko00230,ko01100,ko02010
pme2890	268.055	C8H16N2O4S2	L-Homocystine	Amino acids and derivatives	Amino acids and derivatives	18886	8481.7	14080	105110	25111	36151	C01817	ko00270
mws1060	268.081	C10H12N4O5	9-(β-D-Arabinofuranosyl)hypoxanthine	Nucleotides and derivatives	Nucleotides and derivatives	46164	56212	103580	48509	1978.2	37867	--	--
pme1119	268.081	C10H12N4O5	Inosine	Nucleotides and derivatives	Nucleotides and derivatives	9	9	9	137600	213570	142270	C00294	ko00230,ko01100,ko02010
mws0383	268.24	C17H32O2	Cis-10-Heptadecenoic Acid	Lipids	Free fatty acids	274720	283010	298550	272740	403770	351460	--	--
pmf0293	270.292	C18H38O	1-Octadecanol	Lipids	Free fatty acids	12274	58997	22763	29018	73055	29570	--	--
mws1173	272.068	C15H12O5	Garbanzol	Flavonoids	Flavonols	9	9	9	20841	57457	41355	C09751	ko00941
pme0376	272.068	C15H12O5	Naringenin	Flavonoids	Flavanones	49205	142580	178920	999080	1379400	561670	C00509	ko00941,ko00943,ko01100,ko01110
mws0914	272.068	C15H12O5	Pinobanksin	Flavonoids	Flavanonols	9	9	9	69215	383700	83151	C09826	ko00941
pme3472	272.09	C12H16O7	Arbutin	Phenolic acids	Phenolic acids	9988.4	11367	6901.7	120080	171180	116860	C06186	ko00010
Lmmn003323	272.235	C16H32O3	2-hydroxyhexadecanoic acid	Organic acids	Organic acids	12238000	13978000	15504000	1965200	2062400	776800	--	--
pmp001264	273.267	C16H35NO2	Hexadecylsphingosine	Lipids	Sphingolipids	3679400	4101900	4037100	3837800	3438000	3273100	--	--
pme3285	274.084	C15H14O5	Afzelechin (3,5,7,4'-Tetrahydroxyflavan)	Flavonoids	Flavanols	25130	179620	164970	4456700	2294500	3330000	C09320	ko00941,ko01110
Lmrj002793	276.112	C14H16N2O4	Cyclo(Phe-Glu)	Amino acids and derivatives	Amino acids and derivatives	635500	785520	999440	520360	904980	661580	--	--
pme1712	276.132	C11H20N2O6	L-Saccharopine	Amino acids and derivatives	Amino acids and derivatives	195490	251410	239860	136090	109100	119450	C00449	ko00300,ko00310,ko01100,ko01110,ko01230
MWSslk154	276.28	C12H20O7	Triethyl citrate	Organic acids	Organic acids	600550	499080	498340	1185200	1832800	1003200	--	--
mws5035	278.163	C15H22N2O3	Leucylphenylalanine	Amino acids and derivatives	Amino acids and derivatives	90947	101440	109240	9	9	9	--	--
pmb1650	278.2	C18H30O2	Octadeca-11E,13E,15Z-trienoic acid	Lipids	Free fatty acids	8905700	7172300	8639200	15671000	16392000	11655000	--	--
mws0367	278.225	C18H30O2	α-Linolenic Acid*	Lipids	Free fatty acids	6142100	4999100	7685100	9531000	4823700	4142700	C06427	ko00592,ko01040,ko01100,ko01110
mws0366	278.225	C18H30O2	γ-Linolenic Acid*	Lipids	Free fatty acids	10027000	7846200	11048000	15365000	7541700	9611900	C06426	ko00591,ko01040,ko01100
Lmbn005923	278.225	C18H30O2	Crepenynic acid	Lipids	Free fatty acids	100210	78684	108680	134250	58816	60384	C07289	ko00591
pmb0889	278.225	C18H30O2	Punicic acid	Lipids	Free fatty acids	285210	355330	522350	301510	369880	211450	C08364	--
mws0629	280.106	C13H16N2O5	Asp-phe	Amino acids and derivatives	Amino acids and derivatives	2783400	2425900	2395200	3506900	2589500	2377300	--	--
Lmbn006152	280.24	C18H32O2	(9Z,11E)-Octadecadienoic acid	Lipids	Free fatty acids	26588	25068	34236	11055	7873	7105	C04056	ko00591
MWS4354	281.112	C11H15N5O4	N6-methyladenosine	Nucleotides and derivatives	Nucleotides and derivatives	804770	611070	830930	1285500	565620	979010	--	--
Hmhp001812	281.112	C11H15N5O4	2'-O-Methyladenosine	Nucleotides and derivatives	Nucleotides and derivatives	4707600	3855600	5068000	2008100	1055800	1709800	--	--
YC512118	281.272	C18H35NO	Octadecenoic amide	Lipids	Free fatty acids	2804.2	1674.4	3682.4	4303.1	3457.3	5016.5	--	--
Lmyn012331	282.256	C18H34O2	Petroselinic acid	Lipids	Free fatty acids	3679900	3294500	4092700	998940	974560	1054700	C08363	--
mws2623	282.256	C18H34O2	11-Octadecanoic acid(Vaccenic acid)	Lipids	Free fatty acids	4136400	3203600	4659900	1039600	966300	1089600	--	--
pme1178	283.092	C10H13N5O5	Guanosine	Nucleotides and derivatives	Nucleotides and derivatives	7029400	4702300	6613400	15097000	7302600	7899400	C00387	ko00230,ko01100,ko02010
pme3350	283.092	C10H13N5O5	8-Hydroxy-2-deoxyguanosine	Nucleotides and derivatives	Nucleotides and derivatives	196350	172070	159380	18001	13590	11324	--	--
Hmyp008708	284.068	C16H12O5	Izalpinin	Flavonoids	Flavonols	148340	324100	357060	9	9	9	--	--
mws0129	284.068	C16H12O5	Genkwanin	Flavonoids	Flavones	426240	673040	1115300	5772.2	5031.3	12469	C10046	--
pmp000968	284.068	C16H12O5	Wogonin	Flavonoids	Flavones	515600	1118400	1163200	9	9	9	C10197	--
mws0051	284.068	C16H12O5	Acacetin	Flavonoids	Flavones	442130	941890	1076400	3417.7	1430	2383	C01470	ko00944
Hmlp005105	284.068	C16H12O5	3,7-dihydroxy-4'-methoxyflavone	Flavonoids	Flavones	214190	379480	595540	7002.8	10245	6927.8	--	--
mws0668	284.076	C10H12N4O6	Xanthosine	Nucleotides and derivatives	Nucleotides and derivatives	1497800	1339600	1714600	865530	240210	500910	C01762	ko00230,ko00232,ko01100,ko01110,ko02010
MWSslk110	284.09	C13H16O7	Helecin	Others	Saccharides and Alcohols	9	9	9	210040	312890	183230	--	--
pma1751	285.085	C12H15NO7	N-(beta-D-Glucosyl)nicotinate	Others	Vitamin	945580	5254800	6610400	1794300	6680400	2344600	--	--
pmp001269	285.303	C18H39NO	Hexadecyl ethanolamine	Alkaloids	Alkaloids	1974500	1639500	1447600	627310	580790	341320	--	--
pme0088	286.048	C15H10O6	Luteolin	Flavonoids	Flavones	3206.9	4829.3	6611.7	24734	42725	20330	C01514	ko00941,ko00944,ko01100,ko01110
MWSHY0089	286.084	C16H14O5	5,4'-Dihydroxy-7-methoxyflavanone (Sakuranetin)	Flavonoids	Flavanones	70891	151140	134960	9	9	9	C09833	ko00941,ko01110
Cmsp008121	286.084	C16H14O5	7-O-Methylnaringenin	Flavonoids	Flavanones	56181	146710	123310	9	9	9	--	--
mws1521	286.105	C13H18O7	Salicin	Phenolic acids	Phenolic acids	41544	36163	46708	82202	169860	112580	C01451	ko00010
Hmcp004650	286.212	C16H30O4	Hexadecanedioic acid	Lipids	Free fatty acids	9	9	9	22636	143980	11540	--	--
Zmyn005252	286.251	C17H34O3	3-Hydroxy-palmitic acid methyl ester	Lipids	Free fatty acids	7761800	7136100	7446400	918210	1052300	418720	C11849	--
mws0064	288.063	C15H12O6	Eriodictyol	Flavonoids	Flavanones	43780	189820	329270	583830	643650	296390	C05631	ko00941,ko01100,ko01110
mws1094	288.063	C15H12O6	Dihydrokaempferol	Flavonoids	Flavanonols	27369	42233	54983	88372	150420	98596	C00974	ko00941,ko01100,ko01110
pmb3081	290.004	C6H11PO11	Glucarate O-Phosphoric acid	Others	Saccharides and Alcohols	1156400	2523900	2618000	3931100	3378900	3784000	--	--
Lmyn003835	290.043	C14H10O7	4-(3,4,5-Trihydroxybenzoxy)benzoic acid	Phenolic acids	Phenolic acids	10038	245820	650360	3548600	7347400	4177500	--	--
pme0460	290.079	C15H14O6	Epicatechin*	Flavonoids	Flavanols	1844.9	11831	31132	250570	538380	407060	C09727	ko00941,ko01100,ko01110
Lmhn004030	290.079	C15H14O6	5,7,3',4',5'-Pentahydroxyflavan (Tricetiflavan)	Flavonoids	Flavanols	26388	321830	925640	3876200	9605900	6464400	--	--
mws0054	290.079	C15H14O6	Catechin*	Flavonoids	Flavanols	4311.2	9822.2	40869	1641800	1736000	1686800	C06562	ko00941,ko01110
pmb2657	290.123	C10H18N4O6	Argininosuccinic acid	Organic acids	Organic acids	87225	132500	112780	709360	665620	582570	C03406	ko00220,ko00250,ko01100,ko01110,ko01230
pmb0885	290.188	C18H26O3	4-oxo-9Z,11Z,13E,15E-octadecatetraenoic acid	Lipids	Free fatty acids	6335	5108.7	2635.2	4477.9	6915.7	6312.7	--	--
mws2120	292.022	C13H8O8	Brevifolin carboxylic acid	Phenolic acids	Phenolic acids	7611	16757	40883	1181800	1507000	936260	--	--
pmb2893	292.154	C14H20N4O3	N-p-Coumaroylhydroxyagmatine	Alkaloids	Phenolamine	243160	245970	220080	21185	18772	13670	--	--
Zmdn001564	294.122	C14H18N2O5	γ-Glutamylphenylalanine	Amino acids and derivatives	Amino acids and derivatives	215580	261050	219430	83311	28471	39007	--	--
Zmyn004676	294.219	C18H30O3	17-Hydroxylinolenic acid	Lipids	Free fatty acids	45711	50705	56928	50742	35306	41177	C16346	ko00592
pma3606	294.219	C18H30O3	9-Hydroxy-10,12,15-octadecatrienoic acid	Lipids	Glycerol ester	191390	172520	200420	281990	186670	162250	--	--
Zmyn004732	294.219	C18H30O3	2R-hydroxy-9Z,12Z,15Z-octadecatrienoic acid	Lipids	Free fatty acids	69274	84779	139730	91449	25251	36755	C16342	ko00592
pmb2786	294.219	C18H30O3	9-HOTrE	Lipids	Free fatty acids	9820.8	13611	17121	22852	34059	23848	--	--
Lmqp000329	295.056	C8H14N3O7P	5-aminoimidazole ribonucleotide	Nucleotides and derivatives	Nucleotides and derivatives	51161	45167	50694	57661	9	137730	--	--
Rfmb091	296.235	C18H32O3	9S-Hydroxy-10E,12Z-octadecadienoic acid	Lipids	Free fatty acids	131810	129110	156010	131200	252090	128710	C14767	ko00591
Lmbn005369	296.235	C18H32O3	13(S)-HODE;13(S)-Hydroxyoctadeca-9Z,11E-dienoic acid	Lipids	Free fatty acids	110790	95693	107560	89013	144620	93246	C14762	ko00591
pmb2778	296.235	C18H32O3	9,10-EODE*	Lipids	Free fatty acids	370260	419580	561500	268950	303700	219000	--	--
pmb2799	296.235	C18H32O3	12,13-EODE*	Lipids	Free fatty acids	10277	9186.4	10587	16394	9422.8	6284.3	--	--
Lmbn005662	296.235	C18H32O3	9(10)-EpOME;(9R,10S)-(12Z)-9,10-Epoxyoctadecenoic acid	Lipids	Free fatty acids	30222	23567	28747	25278	10748	13521	C14825	ko00591,ko01100
pme1474	297.09	C11H15N5O3S	5'-Deoxy-5'-(methylthio)adenosine	Nucleotides and derivatives	Nucleotides and derivatives	40492000	36982000	40937000	47167000	37140000	31388000	C00170	ko00270,ko00908,ko01100
pmb0197	297.107	C11H15N5O5	N2-methylguanosine	Nucleotides and derivatives	Nucleotides and derivatives	124370	70157	119810	78955	10217	39121	--	--
pmp001204	298.084	C17H14O5	Apigenin-7,4'-dimethylether	Flavonoids	Flavones	11229	19485	21305	9	9	9	--	--
ML10195036	299.282	C18H37NO2	3-Dehydrosphinganine	Lipids	Sphingolipids	2178700	1991800	2224700	14715	22168	9527.1	C02934	ko00600,ko01100
Lmhn001386	300.048	C12H12O9	Vnilloyltartaric acid	Phenolic acids	Phenolic acids	127150	114530	114260	9	9	9	--	--
mws0058	300.063	C16H12O6	Diosmetin	Flavonoids	Flavanones	35436	28400	27892	26822	48689	13404	--	--
pmp001127	300.063	C16H12O6	Chrysoeriol	Flavonoids	Flavones	4358.8	20892	36149	9	9	9	C04293	ko00944
pmp000971	300.063	C16H12O6	6-Demethoxy-7-methylcapillarisin	Others	Others	12885	1298.2	4308.5	9	9	9	--	--
Lmjp004941	300.063	C16H12O6	Rhamnocitrin (7-Methylkaempferol)	Flavonoids	Flavonols	23675	14144	15415	14242	23845	7206.4	C17059	--
Zmhn001926	300.084	C13H16O8	1-O-Salicyloyl-β-D-glucose	Phenolic acids	Phenolic acids	2443400	3046800	2152600	587910	633890	442260	--	--
Zmhn001358	300.084	C13H16O8	4-O-Glucosyl-4-hydroxybenzoic acid	Phenolic acids	Phenolic acids	349060	378110	427460	270470	265510	231010	--	--
Zmxn001997	300.084	C13H16O8	Isosalicylic acid O-glycoside	Phenolic acids	Phenolic acids	393780	420570	419790	304300	301980	226470	--	--
pmb3142	300.085	C13H16O8	Salicylic acid-2-O-glucoside	Phenolic acids	Phenolic acids	5312000	3486400	4516700	1500600	467450	1013000	--	--
Hmtn001302	300.085	C13H16O8	Glucosyloxybenzoic acid	Phenolic acids	Phenolic acids	1774600	2658000	1781100	611190	802530	389170	--	--
Zmyn005384	300.266	C18H36O3	2R-Hydroxyoctadecanoic Acid	Lipids	Free fatty acids	47933	51726	59743	13747	24950	10380	C03042	--
Lmqn008288	300.267	C18H36O3	3-hydroxy-stearic acid	Lipids	Free fatty acids	159510	171890	218220	243960	234710	223890	--	--
Hmyp002315	302.042	C15H10O7	3,5,7,4'--Tetrahydroxy-Coumaronochromone	Others	Others	9	9	9	49478	126720	76078	--	--
Hmcn002875	302.043	C15H10O7	6-Hydroxyluteolin	Flavonoids	Flavones	9	9	9	16658	34359	13289	--	--
Zmhn000892	302.1	C13H18O8	4-O-Glucosyl-3,4-dihydroxybenzyl alcohol	Phenolic acids	Phenolic acids	614560	736300	608540	216790	35152	145270	--	--
Hmqn000843	302.1	C13H18O8	Tachioside	Phenolic acids	Phenolic acids	37757	52803	82844	182520	231340	199860	--	--
MWSmce549	302.45	C17H34O4	1-Monomyristin	Lipids	Free fatty acids	716940	605010	642910	629760	539920	689460	--	--
mws0044	304.058	C15H12O7	Dihydroquercetin(Taxifolin)	Flavonoids	Flavanonols	48794	85969	97476	1438600	2369800	1265200	C01617	ko00941,ko01100,ko01110
Hmqn003268	304.059	C15H12O7	5,7,3',4',5'-Pentahydroxydihydroflavone	Flavonoids	Flavanones	9	9	9	144550	404200	199300	--	--
Lmmp003109	304.095	C16H16O6	3'-O-Methyl-epicatechin	Flavonoids	Flavanols	53651	113720	225790	247380	466800	232250	--	--
mws0049	306.074	C15H14O7	Gallocatechin*	Flavonoids	Flavanols	9	9	9	18278000	54998000	31170000	C12127	ko00941,ko01110
mws0042	306.074	C15H14O7	Epigallocatechin*	Flavonoids	Flavanols	9	12059	28253	13102000	39753000	22347000	C12136	ko00941,ko01110
pmb0496	306.169	C15H22N4O3	N-Feruloylagmatine	Alkaloids	Phenolamine	9	9	9	75753	1077400	505710	C18325	ko00330,ko01100
Zmpn003698	306.256	C20H34O2	11,14,17-Eicosatrienoic acid	Lipids	Free fatty acids	13402	7694.2	13139	3011.5	2982.2	2427.9	C16522	ko01040
Lmbn006210	306.256	C20H34O2	Dihomo-gamma-linolenic acid; (8Z,11Z,14Z)-Icosatrienoic acid	Lipids	Free fatty acids	12308	8189.4	12073	9	9	9	C03242	ko00591,ko01040,ko01100
pme1086	307.084	C10H17N3O6S	Glutathione reduced form	Amino acids and derivatives	Amino acids and derivatives	4162800	3471900	3033200	74633	263070	61838	C00051	ko00270,ko00480,ko01100,ko01240,ko02010
pmn001610	308.272	C20H36O2	Eicosadienoic acid	Lipids	Free fatty acids	382620	299990	346550	963930	428440	577790	C16525	ko01040
pmb2857	309.106	C11H19NO9	L-Glutamic acid O-glycoside	Amino acids and derivatives	Amino acids and derivatives	23709	25124	41174	40678	22025	33500	--	--
pmb2791	310.1	C18H30O4	9-HpOTrE	Lipids	Free fatty acids	54836	42476	47633	40717	34952	40662	C16321	ko00592,ko01110
Lmsn004674	310.105	C15H18O7	1-O-Cinnamoyl-β-D-glucose	Phenolic acids	Phenolic acids	9	9	9	67614	93946	60793	--	--
Zmdp001857	310.116	C14H18N2O6	γ-Glutamyltyrosine	Amino acids and derivatives	Amino acids and derivatives	232430	283620	296660	453720	116420	187770	--	--
Zmzn003953	310.214	C18H30O4	13(s)-hydroperoxy-(9z,11e,15z)-octadecatrienoic acid	Lipids	Free fatty acids	41707	56049	66097	62004	67069	74535	C04785	ko00592,ko01100,ko01110
Zmyn004449	310.214	C18H30O4	9-Hydroxy-12-oxo-10(E),15(Z)-octadecadienoic acid	Lipids	Free fatty acids	17977	23250	23438	7717.7	4122.4	5823.1	C21923	ko00592,ko01110
pme3967	311.123	C12H17N5O5	2-(Dimethylamino)guanosine	Nucleotides and derivatives	Nucleotides and derivatives	6306300	5155800	6522100	5461100	6940400	4976500	--	--
Lmcp002302	311.123	C12H17N5O5	N6-(2-Hydroxyethyl)adenosine	Nucleotides and derivatives	Nucleotides and derivatives	5771200	5408600	7194700	5002600	7068900	4284800	--	--
pmb2804	312.1	C18H32O4	13-HPODE	Lipids	Free fatty acids	44487	60260	97364	16857	17375	18531	C04717	ko00591,ko01100
Lmtn003441	312.121	C15H20O7	2-Acetyl-3-hydroxyphenyl-1-O-glucoside	Phenolic acids	Phenolic acids	9	9	9	71069	79736	49692	--	--
mws0636	312.147	C18H20N2O3	Phe-Phe	Amino acids and derivatives	Amino acids and derivatives	10626	13457	24786	69687	33985	27609	--	--
Rfmb087	312.23	C18H32O4	13-Oxo-9-hydroxy-10-octadecenoic acid	Lipids	Free fatty acids	26517	20994	27218	9	9	9	--	--
Lmbn004685	312.23	C18H32O4	5S,8R-DiHODE; (5S,8R,9Z,12Z)-5,8-Dihydroxyoctadeca-9,12-dienoate	Lipids	Free fatty acids	51332	44653	56422	34028	33573	37196	C20186	ko00591
MWS80006	312.23	C18H32O4	9-Hydroperoxy-9Z,11E-Octadecadienoic Acid	Lipids	Free fatty acids	10759	7585.9	8424.8	10027	8477.3	7642.2	C14827	ko00591,ko01100
mws0038	314.079	C17H14O6	Kumatakenin	Flavonoids	Flavonols	1025600	2126800	3465300	4704.5	3623.1	2399.7	--	--
Lmsp008392	314.079	C17H14O6	4',5-Dihydroxy-3',5'-dimethoxyflavone	Flavonoids	Flavones	258420	613270	886370	9	9	9	--	--
pmp000002	314.079	C17H14O6	Ladanein	Flavonoids	Flavones	2731200	6910300	11004000	17401	6386.8	2907.2	--	--
Lmmn002179	314.1	C14H18O8	Methyl salicylate-2-O-glucoside	Phenolic acids	Phenolic acids	466190	621000	821790	165690	95990	75524	--	--
Lmbn007891	314.246	C18H34O4	Hydroxy ricinoleic acid	Lipids	Free fatty acids	7464.4	5710.6	6868.1	7136.6	6118.6	5249.7	--	--
Lmbn005487	314.246	C18H34O4	12,13-DHOME; (9Z)-12,13-Dihydroxyoctadec-9-enoic acid	Lipids	Free fatty acids	7980.6	7703.9	10376	8013.4	8672.2	6538.4	C14829	ko00591
pmb2871	316.079	C13H16O9	2,5-Dihydroxy benzoic acid O-hexside	Phenolic acids	Phenolic acids	7013800	5072400	5951900	2887800	2384000	2096500	--	--
pmn001367	316.079	C13H16O9	Protocatechuic acid-4-O-glucoside	Phenolic acids	Phenolic acids	5358100	3961100	4592600	1272000	1017000	1768700	--	--
Hmtn001120	316.116	C14H20O8	5-(2-Hydroxyethyl)-2-O-glucosylphenol	Phenolic acids	Phenolic acids	249810	232470	212740	193160	242190	192530	--	--
pme3459	316.204	C20H28O3	Caffeyl alcohol	Terpenoids	Ditepenoids	177090	142110	144550	9	9	9	C09066	--
pmb2221	317.293	C18H39NO3	4-Hydroxysphinganine	Lipids	Sphingolipids	14576000	13808000	15794000	6028000	2818000	3906400	C12144	ko00600,ko01100
mws0032	318.038	C15H10O8	Myricetin	Flavonoids	Flavonols	9	9	9	10100	80461	25913	C10107	ko00941,ko00944,ko01110
pmp001267	319.288	C21H37NO	2-(Dodecylamino)-3-phenyl-1-propanol	Others	Others	43756	52151	57767	19969	11151	14066	--	--
mws0744	320.053	C15H12O8	Dihydromyricetin(Ampelopsin)	Flavonoids	Flavanonols	9	9	9	308840	1533200	640330	C02906	ko00941,ko01110
pmb0751	320.09	C16H16O7	Trans-5-O-(p-Coumaroyl)shikimate	Phenolic acids	Phenolic acids	615160	539720	523250	179560	259580	144000	C02947	ko00940,ko00941,ko00945,ko01100,ko01110
pmb3075	320.09	C16H16O7	3-O-p-Coumaroylshikimic acid	Phenolic acids	Phenolic acids	69131	51016	62436	26882	41862	18466	--	--
mws0582	321.099	C11H19N3O6S	S-(methyl)glutathione	Amino acids and derivatives	Amino acids and derivatives	321870	495460	530390	1010300	2002800	2063700	C11347	--
MWS20022	322.251	C20H34O3	15S-Hydroxy-8,11,13-eicosatrienoic acid	Lipids	Free fatty acids	11275	10586	12656	9	9	9	--	--
pme3174	323.052	C9H14N3O8P	Cytidine 5'-monophosphate(Cytidylic acid)	Nucleotides and derivatives	Nucleotides and derivatives	39033	47358	51947	88883	40009	48109	C00055	ko00240,ko01100
pme2074	323.21	C18H29NO4	(-)-Jasmonoyl-L-Isoleucine	Amino acids and derivatives	Amino acids and derivatives	33117	107850	121810	142820	111230	84546	C18699	ko04075
pme3188	324.036	C9H13N2O9P	Uridine 5'-monophosphate	Nucleotides and derivatives	Nucleotides and derivatives	236470	223830	255980	193440	64966	110050	C00105	ko00240,ko01100,ko01240
Hmqp006023	324.266	C20H36O3	Ethyl 9-Hydroxy-10,12-octadecadienoic acid	Lipids	Free fatty acids	54376	29005	33494	8709.4	10945	8633.7	--	--
mws0983	325.298	C20H39NO2	N-Oleoylethanolamine	Alkaloids	Alkaloids	413660	211770	238990	89072	92130	69262	C20792	--
Hmhn003067	326.1	C15H18O8	Phenylpropionic acid-O-β-D-glucopyranoside	Phenolic acids	Phenolic acids	9	9	9	29643	76996	32227	--	--
Jmwn002494	326.1	C15H18O8	(2E)-3-[4-(β-D-glucopyranoside)-phenylacrylic]-acid	Phenolic acids	Phenolic acids	4493.2	5424.3	8626.7	423030	267980	372800	--	--
Lmsn003111	326.1	C15H18O8	1-O-p-Coumaroyl-β-D-glucose	Phenolic acids	Phenolic acids	55206	99915	86826	4625600	2858100	2500000	C16827	--
Lmqn000351	326.121	C12H22O10	Rutinose	Others	Saccharides and Alcohols	95740	109000	72469	92951	78653	124800	C08247	--
MWSmce278	326.43	C21H26O3	Acitretin	Others	Vitamin	4965.3	6091.9	8335.6	11041	13816	8858.5	--	--
HJAP059	328.094	C18H16O6	Salvigenin	Flavonoids	Flavones	523170	1231500	1570600	2763	1785.8	610.74	--	--
Zmjp008503	328.094	C18H16O6	5-Hydroxy-4',6,7-trimethoxyflavone (Salvigenin)	Flavonoids	Flavones	10130	21484	25795	9	9	9	--	--
Lmsp011263	328.095	C18H16O6	6-Hydroxy-5,7,4'-trimethoxyflavone	Flavonoids	Flavones	29461	75771	96287	9	9	9	C14985	--
pmn001690	328.152	C16H24O7	3-Hydroxy-4-isopropylbenzylalcohol 3-glucoside	Phenolic acids	Phenolic acids	8456700	5226800	6400800	3175200	2084800	2673800	--	--
mws0884	329.053	C10H12N5O6P	Cyclic AMP	Nucleotides and derivatives	Nucleotides and derivatives	47717	32940	47549	63800	33935	29979	C00575	ko00230,ko01100
mws0917	330.074	C17H14O7	3,7-Di-O-methylquercetin	Flavonoids	Flavonols	17989	32099	50610	5817	8973	3091	C01265	ko00944
Lmtn002565	330.095	C14H18O9	1'-O-vanilloyl-β-D-glucoside	Phenolic acids	Phenolic acids	132040	345750	501600	2727100	1993700	1841000	--	--
HmLn002358	330.095	C14H18O9	Vanillic acid-glucoside	Phenolic acids	Phenolic acids	37799	26999	9	255770	198860	173230	--	--
Lmmn003663	330.095	C14H18O9	5-Glucosyloxy-2-Hydroxybenzoic acid methyl ester	Phenolic acids	Phenolic acids	296950	783650	1164400	3154000	2271700	2685400	--	--
pmp001045	330.131	C15H22O8	Bartsioside	Others	Others	11224	11367	9	81252	26032	57488	--	--
pmn001517	330.131	C15H22O8	3,4,5-Trimethoxyphenyl-β-D-Glucopyranoside	Phenolic acids	Phenolic acids	5330100	5619500	8304100	10973000	13672000	11511000	--	--
pmn001694	330.241	C18H34O5	9,10,13-Trihyroxy-11-octadecadienoic acid	Lipids	Free fatty acids	345930	273050	404320	90109	112860	109750	--	--
pmp001284	330.277	C19H38O4	Monopalmitin	Lipids	Glycerol ester	110490	75587	103930	66695	40278	93928	--	--
pme3184	331.068	C10H14N5O6P	2'-Deoxyadenosine-5'-monophosphate	Nucleotides and derivatives	Nucleotides and derivatives	19976	30540	23190	1093900	1484200	859520	C00360	ko00230,ko01100
pmb0789	331.127	C14H21NO8	Pyridoxine-5'-O-glucoside	Others	Vitamin	126770	69566	110860	4000000	5334800	4343300	C03996	--
pmc0066	332.052	C10H13N4O7P	2'-Deoxyinosine-5'-monophosphate	Nucleotides and derivatives	Nucleotides and derivatives	808230	1018600	794250	693590	496650	420090	C06196	ko00230
HmLn000873	332.075	C13H16O10	2-O-Galloyl-β-D-glucose	Phenolic acids	Phenolic acids	9	9	9	482250	1136600	1385600	--	--
Zmxn110201	332.111	C14H20O9	2,6-Dimethoxy-4-hydroxyphenol-1-O-ß-D-glucopyranoside	Others	Others	17771	45437	42927	262960	952840	451360	--	--
Wmyn000217	332.111	C14H20O9	2,6-dimethoxy-hydroquinone-4-O-β-D-glucopyranoside	Phenolic acids	Phenolic acids	33009	32956	50600	1190600	1918000	1249800	--	--
mws0675	334.057	C11H15N2O8P	β-Nicotinamide mononucleotide	Nucleotides and derivatives	Nucleotides and derivatives	45193	49750	62364	71761	26075	21421	C00455	ko00760,ko01100
Lmqn000432	334.067	C9H19O11P	1-(sn-Glycero-3-phospho)-1D-myo-inositol	Others	Saccharides and Alcohols	32748	17272	69517	43388	22428	190680	--	--
Hmln002806	336.085	C16H16O8	3-O-Caffeoylshikimic acid	Phenolic acids	Phenolic acids	9	9	9	151030	66841	37080	--	--
pmb1207	338.079	C19H14O6	O-Feruloyl 3-hydroxylcoumarin	Lignans and Coumarins	Coumarins	6357.6	12948	16663	26724	43214	55731	--	--
pmb3074	338.1	C16H18O8	3-O-p-Coumaroyl quinic acid	Phenolic acids	Phenolic acids	21953	33565	29309	59162	84529	29647	C12208	ko00940,ko00941,ko00945,ko01110
Zmyn000083	339.996	C6H14O12P2	D-Glucose 1,6-bisphosphate	Others	Saccharides and Alcohols	45636	64471	78082	73920	56593	108270	C01231	ko00500,ko01100
mws5039	340.079	C15H16O9	Esculin Hydrate	Lignans and Coumarins	Coumarins	1016700	1122000	838330	3346500	2597400	4624300	--	--
Jmwn002620	342.095	C15H18O9	Vanillic Acid-4-O-Glucuronide	Phenolic acids	Phenolic acids	11439	9	10629	458530	238490	332440	--	--
pmn001420	342.095	C15H18O9	1-O-Caffeoyl-β-D-glucose	Phenolic acids	Phenolic acids	160450	271650	213310	12294000	11281000	10049000	C10433	--
Lmsp009872	342.11	C19H18O6	Tetramethylluteolin (3',4',5,7-Tetramethoxyflavone)	Flavonoids	Flavones	9	9	9	6284.9	757.9	3050	--	--
mws1080	342.116	C12H22O11	Galactinol*	Others	Saccharides and Alcohols	4752500	4882100	5347500	3328800	4580400	5626000	--	--
Lmsn000381	342.116	C12H22O11	D-Maltose*	Others	Saccharides and Alcohols	842720	645980	427000	829660	778670	752890	C01971	--
MA10039641	342.116	C12H22O11	Lactobiose*	Others	Saccharides and Alcohols	146060	296980	398780	321400	224970	291310	C00243	ko00052,ko01100,ko02010
pme0519	342.116	C12H22O11	D-(+)-Sucrose*	Others	Saccharides and Alcohols	3850200	3860600	3681600	2891900	4133200	4551900	C00089	ko00052,ko00500,ko01100,ko01110,ko02010
mws0264	342.116	C12H22O11	D-(+)-TrehaloseAnhydrous*	Others	Saccharides and Alcohols	262560	241100	445850	399450	444350	854560	C01083	ko00500,ko01100,ko01110,ko02010
mws1333	342.116	C12H22O11	Melibiose*	Others	Saccharides and Alcohols	304050	169870	409610	259420	325490	395830	C05402	ko00052,ko01100,ko02010
mws5038	342.116	C12H22O11	Isomaltulose*	Others	Saccharides and Alcohols	581790	772110	444980	762110	913070	924140	--	--
mws0906	342.131	C16H22O8	Coniferin	Phenolic acids	Phenolic acids	252500	393100	380240	14344000	12666000	13721000	C00761	ko00940
MWSmce203	342.3	C12H22O11	D-(+)-Cellobiose*	Others	Saccharides and Alcohols	48870	31275	57002	45510	39780	45425	--	--
MWSslk074	344.132	C12H24O11	Lactitol	Others	Saccharides and Alcohols	3258500	3650700	3891300	3649100	5232500	4662800	--	--
MWS1983	344.132	C12H24O11	Maltitol	Others	Saccharides and Alcohols	48182	57529	52987	40320	57415	30131	--	--
mws0609	345.047	C10H12N5O7P	Guanosine 3',5'-cyclic monophosphate	Nucleotides and derivatives	Nucleotides and derivatives	278120	284230	330070	83964	143720	50636	C00942	ko00230,ko01100
Lmtn000940	346.09	C14H18O10	1-O-(3,4-Dihydroxy-5-methoxy-benzoyl)-glucoside	Phenolic acids	Phenolic acids	9	9	9	96883	60617	76007	--	--
pmb0981	347.063	C10H14N5O7P	Adenosine 5'-monophosphate	Nucleotides and derivatives	Nucleotides and derivatives	1057800	2055000	2996000	2504300	2002200	1977900	C00020	ko00230,ko00908,ko01100,ko01110,ko01240
pmb0532	348.047	C10H13N4O8P	Inosine 5'-monophosphate	Nucleotides and derivatives	Nucleotides and derivatives	88519	124370	199540	159210	159550	146150	C00130	ko00230,ko01100,ko01110,ko01240
pmn001381	350.158	C15H26O9	Eucommioside	Terpenoids	Terpene	291420	277790	274100	2719000	1659600	1578700	--	--
MWS0994	352.087	C10H16N4O10	N-Carbamoyl-L-aspartate	Amino acids and derivatives	Amino acids and derivatives	14502	13435	12269	17794	11280	15837	C00438	ko00240,ko00250,ko01100,ko01240
Lmhp011388	352.261	C21H36O4	2-γ-Linolenoyl-glycerol*	Lipids	Glycerol ester	243470	185580	213610	368710	369600	382990	--	--
Lmhp011562	352.261	C21H36O4	1-α-Linolenoyl-glycerol*	Lipids	Glycerol ester	56116	31432	37061	42547	71045	68884	--	--
pme1816	354.095	C16H18O9	Neochlorogenic acid(5-O-Caffeoylquinic acid)*	Phenolic acids	Phenolic acids	9	9	25164	54699	34093	23516	C17147	--
mws0178	354.095	C16H18O9	Chlorogenic acid*	Phenolic acids	Phenolic acids	66875	40717	374830	130230	298620	179680	C00852	ko00940,ko00941,ko00945,ko01110
pmb0890	354.277	C21H38O4	MAG(18:2)*	Lipids	Glycerol ester	394420	410390	495650	510820	708800	429970	--	--
pmp001283	354.277	C21H38O4	Glyceryl linoleate	Lipids	Glycerol ester	8509	6466.3	6685.8	7245.3	12588	14310	--	--
Lmhp112042	354.277	C21H38O4	1-Linoleoylglycerol*	Lipids	Glycerol ester	77525	46083	80426	99197	108670	75248	--	--
pmb0164	354.277	C21H38O4	MAG(18:2)isomer1*	Lipids	Glycerol ester	44054	37136	34763	7876	13707	14899	--	--
Lmhp012042	354.277	C21H38O4	2-Linoleoylglycerol*	Lipids	Glycerol ester	98642	67452	78521	108730	90028	70386	--	--
Cmbn003496	356.111	C16H20O9	5-O-feruloyl-L-arabinose	Others	Saccharides and Alcohols	35476	33881	36001	302370	130180	139310	--	--
Lmsn003318	356.111	C16H20O9	1-O-Feruloyl-β-D-glucose	Phenolic acids	Phenolic acids	81503	9	36000	91676	31325	50090	C17759	--
Lmsp004450	358.142	C20H22O6	Dehydrodiconiferyl alcohol	Phenolic acids	Phenolic acids	677980	698070	797670	1584400	850010	730710	--	--
Hmlp003129	358.142	C20H22O6	Matairesinol	Lignans and Coumarins	Lignans	43219	44305	43575	837540	902030	376080	C10682	ko00998,ko01100,ko01110
mws0097	358.142	C20H22O6	Pinoresinol*	Lignans and Coumarins	Lignans	1029100	642410	708780	3807900	4755000	1766300	C05366	ko00998,ko01100,ko01110
pmp000304	358.142	C20H22O6	30-O-Aangeloylhamaudol	Others	Others	90271	1063.3	5425.1	9	9	9	--	--
Lmdn004267	358.142	C20H22O6	Epipinoresinol*	Lignans and Coumarins	Lignans	843540	381210	476350	2861500	4057700	1612200	--	--
MWS20155	360.085	C18H16O8	Rosmarinic acid	Phenolic acids	Phenolic acids	154140	386890	586140	281810	226660	82917	C01850	ko00350,ko01100
Lmmn003748	360.157	C20H24O6	(+)-Isolariciresinol	Lignans and Coumarins	Lignans	1527300	1102000	1323800	277530	114470	60048	--	--
pmb0998	363.058	C10H14N5O8P	Guanosine 5'-monophosphate	Nucleotides and derivatives	Nucleotides and derivatives	23271	39175	62975	34476	27150	36458	C00144	ko00230,ko01100
mws5040	364.078	C12H21O11Na	Turanose	Others	Saccharides and Alcohols	2016900	2922500	3353600	1945200	1144500	2190500	--	--
pmb0964	365.17	C16H23N5O5	Isopentenyladenine-7-N-glucoside	Nucleotides and derivatives	Nucleotides and derivatives	177630	142840	251240	141000	110650	191800	--	--
pma3724	368.111	C17H20O9	1-O-Feruloylquinic acid	Phenolic acids	Phenolic acids	13370	2590.6	5524.9	447180	234360	509950	--	--
Lmtn003598	368.147	C18H24O8	3-Prenyl-4-O-β-D-glucopyranosyloxy-4-hydroxyl-benzoic acid	Phenolic acids	Phenolic acids	9	9	9	36469	41304	17912	--	--
MWSmce025	370.09	C16H18O10	Fraxetin-8-O-glucoside (Fraxin)	Lignans and Coumarins	Coumarins	9	9	9	211830	93975	154430	C09266	--
mws0055	372.121	C20H20O7	Tangeretin	Flavonoids	Flavones	182300	156700	182030	177690	205270	204850	C10190	--
mws0011	372.142	C17H24O9	Syringin	Phenolic acids	Phenolic acids	30608	64093	90975	38976	35225	27539	C01533	ko00940
Hmgn004139	374.136	C20H22O7	isohydroxymatairesinol	Lignans and Coumarins	Lignans	65822	62364	57635	23305	18345	16033	--	--
Hmlp002744	374.136	C20H22O7	Nortrachelogenin	Lignans and Coumarins	Lignans	9908.5	5478.1	19894	800270	585370	452080	C10725	--
Lmzn001983	376.137	C16H24O10	D-Threo-guaiacylglycerol-7-O-β-D-glucoside	Phenolic acids	Phenolic acids	30893	57358	78944	78633	99022	78250	--	--
mws0232	376.138	C17H20N4O6	Riboflavin	Others	Vitamin	247620	156850	190900	243430	176410	116380	C00255	ko00740,ko01100,ko01110,ko01240,ko02010
MWS0952	381.264	C18H40NO5P	Dihydrosphingosine-1-Phosphate	Lipids	Sphingolipids	12207	8258.6	12233	2182.1	1777.4	539.92	C01120	ko00600,ko01100
pmn001660	382.199	C20H30O7	Cinncassiol A	Phenolic acids	Phenolic acids	6895.3	5387.8	3699.2	27344	2184.2	26862	--	--
pme3337	383.108	C14H17N5O8	N6-Succinyl Adenosine	Nucleotides and derivatives	Nucleotides and derivatives	1096400	1479100	2111000	2250600	3394600	3148500	--	--
pme1286	384.122	C14H20N6O5S	S-(5'-Adenosy)-L-homocysteine	Amino acids and derivatives	Amino acids and derivatives	115860	139660	137740	162110	117930	90675	C00021	ko00270,ko01100,ko01230,ko01240
HJN003	386.122	C17H22O10	1-O-Sinapoyl-D-glucose	Phenolic acids	Phenolic acids	9	9	9	52319	82972	67362	C01175	ko00940
Smgp009046	386.173	C22H26O6	Pinoresinol dimethy ether	Lignans and Coumarins	Lignans	9	9	9	220560	426500	273440	C10561	--
Lmzp006972	386.173	C22H26O6	Dimethylmatairesinol	Lignans and Coumarins	Lignans	9	9	9	217420	378730	265100	--	--
pmp000602	394.126	C19H22O9	6-Hydroxymusizin-8-O-B-D-glucoside	Others	Others	9	9	9	124110	66030	145940	--	--
pme2735	398.137	C15H22N6O5S	S-Adenosylmethionine	Amino acids and derivatives	Amino acids and derivatives	2084500	1931700	1782700	1112900	624250	640110	C00019	ko00261,ko00270,ko00330,ko00908,ko01100,ko01110,ko01230,ko01240,ko04122
pmc0281	399.139	C15H21N5O8	Ribosyladenosine	Nucleotides and derivatives	Nucleotides and derivatives	975380	1553500	1959200	2690500	7908000	6871600	--	--
Cmbp005948	400.116	C21H20O8	1-O-p-Hydroxycinnamoyl-3-O-caffeoylglycerol	Phenolic acids	Phenolic acids	9	9	9	633690	538020	429910	--	--
mws0043	402.131	C21H22O8	Nobiletin	Flavonoids	Flavones	194510	164460	195410	203490	189420	200670	C10112	--
pme3007	404.002	C9H14N2O12P2	Uridine 5'-diphosphate	Nucleotides and derivatives	Nucleotides and derivatives	81793	86198	100540	300160	161890	257010	C00015	ko00240,ko00908,ko01100,ko01240
Hmlp003142	405.178	C21H27NO7	Trachelogenin amide	Alkaloids	Phenolamine	9	9	9	55721	45915	53444	--	--
Lmbp003668	418.09	C20H18O10	Kaempferol-3-O-arabinoside	Flavonoids	Flavonols	9	6730.2	16521	23522	52086	39821	--	--
HJN068	418.091	C20H18O10	Kaempferol-O-pentoside	Flavonoids	Flavones	2328.5	9883.6	24723	37495	75205	48021	--	--
mws2523	422.083	C12H23O14P	Trehalose 6-phosphate	Others	Saccharides and Alcohols	42790	51712	64020	74413	61619	95187	C00689	ko00500,ko01100,ko01110
Cmyp005063	424.173	C21H28O9	Grandidentatin	Phenolic acids	Phenolic acids	9	9	9	157590	176670	151510	C10463	--
Lmhp005784	424.2	C24H28N2O5	p-Coumaroylferuloylcadaverine	Alkaloids	Phenolamine	9	9	9	57682	23740	35102	--	--
Lmhp008337	425.254	C19H40NO7P	LysoPE 14:0(2n isomer)*	Lipids	LPE	46472	31486	36855	18168	6973.3	7741.3	--	--
pmb0864	425.254	C19H40NO7P	LysoPE 14:0*	Lipids	LPE	41070	35146	47551	17988	3973.3	10851	--	--
pmp000436	426.386	C30H50O	Taraxerol	Terpenoids	Triterpene	172630	182690	174300	9	9	9	C08637	ko00909,ko01110
pme2117	427.029	C10H15N5O10P2	Adenosine 5'-Diphosphate	Nucleotides and derivatives	Nucleotides and derivatives	471760	686110	668060	500700	340330	551630	C00008	ko00190,ko00195,ko00230,ko00908,ko01100,ko01110,ko01240
Cmbn007148	430.126	C22H22O9	1-O-Feruloyl-3-O-caffeoylglycerol	Lipids	Glycerol ester	9421.6	25800	9	74752	220640	126200	--	--
MWSHY0189	432.106	C21H20O10	Apigenin-7-O-glucoside(Cosmosiin)	Flavonoids	Flavones	9	9	9	365760	583340	649860	C04608	ko00944
Lmlp005572	432.106	C21H20O10	Galangin-7-O-glucoside	Flavonoids	Flavones	30861	10930	22886	2595600	7114700	5033700	--	--
mws0919	432.106	C21H20O10	Kaempferol-3-O-rhamnoside (Afzelin)(Kaempferin)	Flavonoids	Flavonols	2998.5	6118.1	6574.2	43045	147550	69962	C16911	ko00944
pme0321	432.106	C21H20O10	Kaempferol-7-O-rhamnoside	Flavonoids	Flavonols	2998.5	6118.1	6574.2	43045	147550	69962	--	--
Lmsn002494	434.049	C19H14O12	Ellagic acid-4-O-Xyloside	Tannins	Tannin	34071	64673	124780	525830	1335400	776560	--	--
Zmhp005443	434.085	C20H18O11	Reynoutrin	Flavonoids	Flavones	108860	252490	505470	2598200	3283900	2814200	--	--
mws2186	434.085	C20H18O11	Avicularin(Quercetin-3-O-α-L-arabinofuranoside)	Flavonoids	Flavonols	107170	173960	347670	2183900	3905600	2134100	--	--
pme1611	434.121	C21H22O10	Isohemiphloin	Flavonoids	Flavonoid carbonoside	9	4240.8	12108	283940	467810	339740	--	--
Cmzn005251	434.121	C21H22O10	6-O-Caffeoylarbutin	Phenolic acids	Phenolic acids	41129	9	109190	3626700	6771400	6323200	--	--
mws1179	434.121	C21H22O10	Naringenin-7-O-glucoside	Flavonoids	Flavanones	270790	677940	948590	5443200	5557300	4532700	--	--
HJN087	434.121	C21H22O10	Naringenin-4'-O-glucoside	Flavonoids	Flavanones	75386	182950	293210	8933800	15270000	8747200	--	--
Zmhn001036	434.121	C21H22O10	Choerospondin	Flavonoids	Flavanones	64070	74746	147610	4723100	6773700	4835600	--	--
HJN090	434.121	C21H22O10	Butin-O-glucoside	Flavonoids	Flavanones	85762	149490	263570	8140100	12947000	8463200	--	--
HJN055	436.136	C21H24O10	Dihydrocharcone-4`-O-β-Dglucopyranoside	Flavonoids	Chalcones	25328	21147	28587	108950	315420	144110	--	--
mws2118	436.137	C21H24O10	Phlorizin	Flavonoids	Chalcones	27494	61307	102170	1313100	2771000	1843500	C01604	ko00941,ko01110
Lmhp008440	437.254	C20H40NO7P	LysoPE 15:1*	Lipids	LPE	3609.8	1562.8	4384.4	9187.7	3998.5	3446.5	--	--
Lmhp008273	437.254	C20H40NO7P	LysoPE 15:1(2n isomer)*	Lipids	LPE	3379.7	1977.5	3775.1	9	845.12	2008	--	--
Lmhp008885	439.27	C20H42NO7P	LysoPE 15:0(2n isomer)*	Lipids	LPE	94354	83390	99127	68902	31494	36316	--	--
Lmhp009187	439.27	C20H42NO7P	LysoPE 15:0*	Lipids	LPE	254050	161050	207470	33500	11961	17318	--	--
mws0355	442.09	C22H18O10	Catechin gallate*	Flavonoids	Flavanols	45547	82498	238560	64149	61410	57821	--	--
mws1397	442.09	C22H18O10	Epicatechin gallate*	Flavonoids	Flavanols	47734	64668	183170	61272	57654	75404	--	--
pme1014	444.303	C31H40O2	Menaquinone (K2)	Others	Vitamin	202000	202750	202290	206060	245450	232680	C00828	ko00130,ko01100,ko01110,ko01240
mws0052	446.085	C21H18O11	Baicalin	Flavonoids	Flavones	11864	8682.8	109580	9100.4	5962	951490	--	--
pmp000573	446.121	C22H22O10	Acacetin-7-O-galactoside	Flavonoids	Flavones	12851	55372	72434	9	22485	9	--	--
Hmcp002316	448.1	C21H20O11	Isorhamnetin-3-O-arabinoside	Flavonoids	Flavonols	9165.1	32926	33597	23161	115070	42703	--	--
mws0089	448.101	C21H20O11	Kaempferol-7-O-glucoside	Flavonoids	Flavonols	202700	825750	1254300	2807700	3796500	3662500	--	--
mws0045	448.101	C21H20O11	Quercetin-3-O-α-L-rhamnoside(Quercitrin )	Flavonoids	Flavonols	205280	302600	632760	6853400	11940000	9338300	C01750	ko00944
HJN004	448.101	C21H20O11	Quercetin-O-rhamnoside	Flavonoids	Flavones	209390	254530	474100	6709300	11290000	8431500	--	--
pme2459	448.101	C21H20O11	Luteolin-7-O-glucoside(Cynaroside)	Flavonoids	Flavones	50891	122180	221680	67959	148140	95212	C03951	ko00944
Xmyp005654	448.101	C21H20O11	Kaempferol-4'-O-glucoside	Flavonoids	Flavonols	214830	868980	1624500	3785500	4112900	3381300	--	--
mws0913	448.101	C21H20O11	Kaempferol-3-O-galactoside (Trifolin)*	Flavonoids	Flavonols	128670	414180	699970	229950	9	126650	C12626	ko00944
Lmlp003531	448.101	C21H20O11	Luteolin 3'-O-β-D-glucoside	Flavonoids	Flavones	187280	929010	1292700	2939700	3968400	4201800	--	--
mws2209	448.101	C21H20O11	Kaempferol-3-O-glucoside (Astragalin)*	Flavonoids	Flavonols	223490	1046800	1560900	3561500	4163000	3864400	C12249	ko00944,ko01110
pmn001640	450.08	C20H18O12	Myricetin-3-O-arabinoside	Flavonoids	Flavonols	705.96	1427.3	1407.7	375800	1300200	885350	--	--
Lmsp004301	450.116	C21H22O11	3',5,5',7-Tetrahydroxyflavanone-7-O-glucoside	Flavonoids	Flavanones	3706100	17732000	19438000	16692000	11261000	12560000	--	--
mws1361	450.116	C21H22O11	Astilbin	Flavonoids	Flavanonols	3219000	14391000	21613000	21163000	14207000	15883000	C17449	--
Lmlp005236	450.116	C21H22O11	Dihydrokaempferol-3-O-glucoside	Flavonoids	Flavanonols	3683200	15059000	18742000	17183000	9614700	12503000	--	--
mws0057	450.116	C21H22O11	Eriodictyol 7-O-glucoside	Flavonoids	Flavanones	1527200	6649200	9701600	6684400	3956700	5273800	--	--
Lmtn002796	450.116	C21H22O11	Aromadendrin-7-O-glucoside	Flavonoids	Flavanonols	23419	51631	61678	238710	725670	646700	--	--
HJN086	450.116	C21H22O11	Eriodictyol-3'-O-glucoside	Flavonoids	Flavanones	226730	416880	806690	6703300	4258800	4764000	--	--
Jmgn004021	450.116	C21H22O11	6-C-Glucosyl-2-Hydroxynaringenin	Flavonoids	Flavanones	12100	16577	50851	414110	948570	545940	--	--
MWSmce674	450.35	C31H46O2	Phylloquinone (Vitamin K1)	Others	Vitamin	16430	16514	18296	17647	15007	17030	--	--
Lmhp009034	451.27	C21H42NO7P	LysoPE 16:1*	Lipids	LPE	156980	140160	196730	56295	26056	29737	--	--
Lmhp008763	451.27	C21H42NO7P	LysoPE 16:1(2n isomer)*	Lipids	LPE	65480	44587	41565	23763	13688	10949	--	--
HJN041	452.131	C21H24O11	Epicatechin glucoside	Flavonoids	Flavanols	29068	21570	114480	2013300	2080400	2412500	--	--
Zmdn002353	452.132	C21H24O11	Epicatechin-6-C-β-D-glucopyranoside	Flavonoids	Flavanols	11417	14481	19886	3258900	3218400	3445000	--	--
Zmdn002049	452.132	C21H24O11	Epicatechin-4'-O-β-D-glucopyranoside	Flavonoids	Flavanols	11987	23348	46331	7749800	7285100	8815800	--	--
Zmdn002400	452.132	C21H24O11	Epicatechin-3'-O-β-D-glucopyranoside	Flavonoids	Flavanols	20938	15090	48789	4271300	7003900	4597300	--	--
pmb0876	453.286	C21H44NO7P	LysoPE 16:0*	Lipids	LPE	7114200	5586300	7235300	2450400	861940	1327400	--	--
pmd0160	453.286	C21H44NO7P	LysoPE 16:0(2n isomer)*	Lipids	LPE	6439000	5313100	4641600	2470500	1179900	1039500	--	--
MWS5083	456.105	C17H21N4O9P	Flavin Single Nucleotide(FMN)	Nucleotides and derivatives	Nucleotides and derivatives	603380	627250	675550	159590	60627	131730	C00061	ko00190,ko00740,ko01100,ko01110,ko01240
Lmhn004756	456.106	C23H20O10	Cinnamoylferuloyltartaric acid	Phenolic acids	Phenolic acids	533.28	9	8432.6	41876	80350	78043	--	--
Lmqp013490	456.36	C30H48O3	α-Boswellic acid	Terpenoids	Triterpene	9	9	9	10634	57553	11109	--	--
mws4053	456.36	C30H48O3	Ursolic acid	Terpenoids	Triterpene	1425.9	2324.4	2398.6	785.84	1283	511.16	C08988	--
pmn001700	456.36	C30H48O3	24,30-Dihydroxy-12(13)-enolupinol	Terpenoids	Triterpene	28023	39763	55081	10128	12017	9610.8	--	--
HJN110	456.36	C30H48O3	Betulinic acid	Terpenoids	Triterpene	1871.9	2690.3	2954.2	1868.8	1713.3	2071.4	C08619	--
pmb0464	457.143	C16H27NO14	Aspartic acid di-O-glucoside	Amino acids and derivatives	Amino acids and derivatives	2072300	3134600	4034000	562040	295500	653770	--	--
mws2220	458.085	C22H18O11	Gallocatechin 3-O-gallate*	Flavonoids	Flavanols	83938	82649	66664	65599	70362	89981	--	--
mws0034	458.085	C22H18O11	Epigallocatechin-3-gallate*	Flavonoids	Flavanols	100720	77318	73542	52064	69906	72815	C09731	--
pmb2654	461.153	C19H27NO12	Anthranilate-1-O-Sophoroside	Phenolic acids	Phenolic acids	1696900	1347600	1338800	413520	469850	541160	--	--
mws4167	462.08	C21H18O12	Luteolin-7-O-glucuronide	Flavonoids	Flavones	9	9	9	19776	16103	16106	--	--
Hmcp002539	462.116	C22H22O11	Isorhamnetin-3-O-rhamnoside	Flavonoids	Flavonols	64550	63699	116540	142650	211840	241870	--	--
pmp000579	462.116	C22H22O11	Diosmetin-7-O-galactoside	Flavonoids	Flavanones	299650	723100	823830	30081	112800	86243	--	--
Hmdn001667	464.06	C20H16O13	Ellagic acid-4-O-glucoside	Tannins	Tannin	2772.1	2208.4	9	146440	122790	109410	--	--
mws0856	464.095	C21H20O12	Spiraeoside*	Flavonoids	Flavonols	45584	46881	119840	133480	9	207320	--	--
mws0061	464.095	C21H20O12	Quercetin-3-O-β-D-Galactoside (Hyperin)*	Flavonoids	Flavonols	93975	56778	148170	144130	183180	264120	C10073	--
pmp001309	464.095	C21H20O12	6-Hydroxykaempferol-7-O-glucoside*	Flavonoids	Flavonols	161180	82412	253150	779380	1031200	806390	--	--
Lmpp005784	464.095	C21H20O12	6-methoxy quercetin-3-O-Xyloside	Flavonoids	Flavonols	9	9	9	51480	167020	101510	--	--
mws0056	464.095	C21H20O12	Myricetin-3-O-rhamnoside (Myricitrin)	Flavonoids	Flavonols	7092.3	7830.8	17722	3747100	11741000	7999400	C10108	--
Lmdp003286	464.095	C21H20O12	isohyperoside	Flavonoids	Flavonols	9	9	9	636280	3066300	9	--	--
HJAP110	464.095	C21H20O12	Myricetin-O-rhamnoside	Flavonoids	Flavones	9	9	88730	479100	2470900	1878200	--	--
mws1329	464.095	C21H20O12	Quercetin-7-O-Glucoside*	Flavonoids	Flavonols	9	29079	45009	505920	2460100	1068500	--	--
mws0091	464.095	C21H20O12	Quercetin-3-O-β-D-glucoside(Isoquercitrin)*	Flavonoids	Flavonols	71195	29068	78274	172710	192880	330830	C05623	ko00944,ko01100,ko01110
Smgp004575	464.095	C21H20O12	Quercetin-5-O-β-D-glucoside*	Flavonoids	Flavonols	9	32189	274720	521790	2786600	1870500	--	--
Lmzp002365	464.131	C22H24O11	Hesperetin-7-O-glucoside*	Flavonoids	Flavanones	48926	185540	179670	183110	166000	191180	C16422	ko00941
pme1598	464.132	C22H24O11	Hesperetin-5-O-glucoside*	Flavonoids	Flavanones	72584	26979	50645	247690	215490	237140	--	--
Lmhp009769	465.286	C22H44NO7P	LysoPE 17:1*	Lipids	LPE	33279	30999	35098	43066	16593	21674	--	--
Lmhp009464	465.286	C22H44NO7P	LysoPE 17:1(2n isomer)*	Lipids	LPE	24331	16924	24765	32022	14140	15296	--	--
Xmsn002700	466.111	C21H22O12	Taxifolin-3'-O-β-D-glucoside	Flavonoids	Flavanonols	9	10090	10030	4265900	2268600	2381000	--	--
pmd0130	467.301	C22H46NO7P	LysoPC 14:0(2n isomer)	Lipids	LPC	86035	78292	84460	110720	31172	30681	--	--
Lmhp010162	467.301	C22H46NO7P	LysoPE 17:0	Lipids	LPE	322720	167640	205160	111370	69357	94868	--	--
MWSmce446	468.163	C22H28O11	Cimifugin-7-O-glucoside	Others	Others	314510	306640	385870	137130	132380	178660	--	--
pmp001246	472.191	C22H34NO10+	Sinapine-4-O-Glucoside	Alkaloids	Phenolamine	11816	14927	14090	9	9	9	--	--
mws1610	472.355	C30H48O4	Maslinic acid	Terpenoids	Triterpene	31396	9	9	75284	327520	43656	C16939	--
Lmzn106284	472.355	C30H48O4	Alphitolic acid	Terpenoids	Triterpene	41199	9	9	128630	393920	63269	C16912	--
pmn001706	472.355	C30H48O4	2-Hydroxyoleanolic acid	Terpenoids	Triterpene	57286	9	9	86129	378460	71612	--	--
pmn001705	472.355	C30H48O4	3,24-Dihydroxy-17,21-semiacetal-12(13)oleanolic fruit	Terpenoids	Triterpene	120510	64121	9	9	9	26556	--	--
pmn001727	475.184	C24H29NO9	N-(4-O-(Glucosyl)-E-feruloyl)-tyramine	Alkaloids	Phenolamine	9	9	9	58073	23562	39489	--	--
Lmhp008801	475.27	C23H42NO7P	LysoPE 18:3*	Lipids	LPE	251770	183990	214210	245010	181240	154960	--	--
Lmhp008589	475.27	C23H42NO7P	LysoPE 18:3(2n isomer)*	Lipids	LPE	416270	436600	494550	671810	488170	354160	--	--
pmb0881	477.286	C23H44NO7P	LysoPE 18:2*	Lipids	LPE	6201600	4859800	5860900	3580900	2507100	1737100	--	--
pmb0874	477.286	C23H44NO7P	LysoPE 18:2(2n isomer)*	Lipids	LPE	3596000	3261300	4036000	3704100	1895900	1751700	--	--
Zmhn004909	478.075	C21H18O13	3,4-Digalloylshikimic acid	Phenolic acids	Phenolic acids	11409	17766	49227	14288	11389	9999.4	--	--
Lmpp005842	478.101	C22H22O12	6-methoxy quercetin-3-O-a-L-rhamnopyranoside	Flavonoids	Flavonols	1682	4196.3	1718.4	152630	340090	277430	--	--
Lmjp002906	478.111	C22H22O12	Rhamnetin-3-O-Glucoside	Flavonoids	Flavonols	37733	13443	101190	54467	118820	98214	--	--
Hmcp002207	478.111	C22H22O12	Isorhamnetin-7-O-glucoside (Brassicin)	Flavonoids	Flavonols	11107	22399	51447	403150	1257900	672940	--	--
Xmyp005987	478.111	C22H22O12	Isorhamnetin-3-O-β-D-glucopyranoside	Flavonoids	Flavones	12021	9	60049	348030	1021900	637480	--	--
pmb2260	479.301	C23H46NO7P	LysoPC 15:1	Lipids	LPC	13700	11262	23155	104760	22839	43077	--	--
pmb0856	479.301	C23H46NO7P	LysoPE 18:1(2n isomer)*	Lipids	LPE	1944000	1566600	1815100	667310	217070	389180	--	--
mws0289	479.301	C23H46NO7P	LysoPE 18:1*	Lipids	LPE	3071200	2291600	2918400	1033100	339210	604980	--	--
pmp001265	479.346	C24H49NO8	2-Amino-4-dihydroxy octadecyl β-D-galactoside)	Others	Others	22390	19660	25311	41247	10326	25758	--	--
HJAP017	480.09	C21H20O13	Myricetin-3-O-glucose	Flavonoids	Flavonols	9	9	9	66793	152910	125990	--	--
pmb0883	481.317	C23H48NO7P	LysoPE 18:0*	Lipids	LPE	131430	131870	131440	7753.7	4444.9	7253.7	--	--
pmb2319	481.317	C23H48NO7P	LysoPC 15:0*	Lipids	LPC	282180	281100	346510	117290	60566	66464	--	--
Lmhp009129	481.317	C23H48NO7P	LysoPC 15:0(2n isomer)*	Lipids	LPC	182070	153810	208470	206070	64893	107950	--	--
pmb0880	481.317	C23H48NO7P	LysoPE 18:0(2n isomer)*	Lipids	LPE	44191	37836	45925	12677	4875.8	10289	--	--
Lmsn011830	486.335	C30H46O5	2α,19α-Dihydroxy-3-oxours-12-en-28-oic acid	Terpenoids	Triterpene	117220	9	35127	9	9	9	--	--
Lmmn000214	488.174	C18H32O15	Solatriose	Others	Saccharides and Alcohols	664390	727260	969510	410490	280270	721160	--	--
pmb0863	491.301	C24H46NO7P	LysoPC 16:2(2n isomer)*	Lipids	LPC	9	9	9	43161	22560	15226	--	--
pma1303	491.301	C24H46NO7P	LysoPC 16:2*	Lipids	LPC	9	9	9	43161	22560	15226	--	--
pmb0736	492.127	C23H24O12	Tricin 7-O-Glucoside*	Flavonoids	Flavones	492220	1260500	1765300	18576	41642	10102	--	--
Cmsn002371	492.2	C25H32O10	(+)-Isolariciresinol-9-O-β-D-xylopyranoside	Lignans and Coumarins	Lignans	116690	99850	244820	4820500	5060800	3766400	--	--
pmp001270	493.317	C24H48NO7P	LysoPC 16:1*	Lipids	LPC	239690	216980	254390	407500	147020	257050	--	--
Lmhp008833	493.317	C24H48NO7P	LysoPC 16:1(2n isomer)*	Lipids	LPC	197420	153610	423310	168240	89401	62671	--	--
Lmsn003778	494.106	C22H22O13	1-O-Caffeoyl-4-O-galloyl-β-D-glucose	Phenolic acids	Phenolic acids	15049	18944	10648	24468	7204.3	24386	--	--
pmd0132	495.332	C24H50NO7P	LysoPC 16:0(2n isomer)*	Lipids	LPC	1332700	848480	1159400	1088500	531830	675120	--	--
pmb0855	495.332	C24H50NO7P	LysoPC 16:0*	Lipids	LPC	14048000	13239000	15015000	11302000	5866800	6389700	--	--
Lmhp009802	503.301	C25H46NO7P	LysoPE 20:3(2n isomer)*	Lipids	LPE	685660	844030	963230	704250	419200	389030	--	--
Lmhp010040	503.301	C25H46NO7P	LysoPE 20:3*	Lipids	LPE	300280	158810	204190	271720	107420	122530	--	--
Lmsn002288	504.148	C21H28O14	1-O-Caffeoyl-(6-O-glucosyl)-β-D-glucose	Phenolic acids	Phenolic acids	9	9	9	127800	59187	74319	--	--
pme0500	504.169	C18H32O16	D-(+)-Melezitose*	Others	Saccharides and Alcohols	4639.5	7464.3	9	19119	18706	19518	--	--
Hmqp000191	504.17	C18H32O16	Planteose*	Others	Saccharides and Alcohols	7638.1	10698	27821	12451	5559.6	11993	C03848	--
Lmhp010757	505.317	C25H48NO7P	LysoPE 20:2*	Lipids	LPE	174220	157920	201500	677480	415000	603700	--	--
Lmhp010514	505.317	C25H48NO7P	LysoPE 20:2(2n isomer)*	Lipids	LPE	171420	129280	174190	728630	379750	384310	--	--
Lmhp008718	505.317	C25H48NO7P	LysoPC 17:2	Lipids	LPC	20621	20405	25308	63663	21968	30322	--	--
Zmsp004363	506.106	C23H22O13	Quercetin-3-O-(6''-O-acetyl)glucoside*	Flavonoids	Flavonols	5550.5	6664.4	12520	138400	79495	91789	--	--
Hmln002199	506.107	C23H22O13	Quercetin-3-O-(6''-O-acetyl)-galactoside*	Flavonoids	Flavonols	6999.2	4220.8	3260.2	26753	37745	36363	--	--
MWSmce668	507.18	C10H16N5O13P3	ATP	Nucleotides and derivatives	Nucleotides and derivatives	183750	195360	213730	151780	75311	141090	--	--
Lmhp009590	507.332	C25H50NO7P	LysoPC 17:1	Lipids	LPC	49053	43624	54326	120040	42395	49589	--	--
pmb2406	509.348	C25H52NO7P	LysoPC 17:0*	Lipids	LPC	1385000	1023500	1679700	1489800	1021200	1288400	--	--
Lmhp010515	509.348	C25H52NO7P	LysoPC 17:0(2n isomer)*	Lipids	LPC	1103800	604330	867010	598030	444260	563540	--	--
pmb3055	514.132	C22H26O14	p-Coumaroylquinic acid-4'-O-glucuronide	Phenolic acids	Phenolic acids	9	9	9	249660	6996400	1410600	--	--
Lmhp009526	514.314	C27H46O9	2-γ-Linolenoyl-glycerol-glucoside*	Lipids	Glycerol ester	5210.2	3588.5	11777	41616	47797	21137	--	--
Lmhp009773	514.314	C27H46O9	1-α-Linolenoyl-glycerol-glucoside*	Lipids	Glycerol ester	2396.8	6441.4	8708.8	29265	37247	40191	--	--
Hmqp006235	515.297	C21H46N3O9P	LysoPC 18:4	Lipids	LPC	27286	23749	43373	382000	160920	209700	--	--
Lmhp010573	516.33	C27H48O9	1-Linoleoylglycerol-glucoside*	Lipids	Glycerol ester	4158	9	8748.3	8437.4	10319	7453.3	--	--
Lmhp010334	516.33	C27H48O9	2-Linoleoylglycerol-glucoside*	Lipids	Glycerol ester	4158	9	8748.3	8437.4	10319	7453.3	--	--
MWSmce346	516.45	C25H24O12	1,3-Dicaffeoylquinic acid	Phenolic acids	Phenolic acids	3391.4	5926.2	15232	60416	39183	21486	C10445	--
pmb0865	517.317	C26H48NO7P	LysoPC 18:3(2n isomer)*	Lipids	LPC	2365300	2476400	2678900	5307300	3102500	4128600	--	--
pmb0854	517.317	C26H48NO7P	LysoPC 18:3*	Lipids	LPC	935290	812220	881850	2176500	1071000	1553800	--	--
Hmbn002692	518.164	C22H30O14	6'-O-Feruloyl-D-sucrose	Phenolic acids	Phenolic acids	9	9	9	2071600	166590	546140	--	--
pmp001251	519.332	C26H50NO7P	LysoPC 18:2(isomer)*	Lipids	LPC	12326000	9883100	11947000	28073000	11775000	13036000	--	--
pmp001273	519.332	C26H50NO7P	LysoPC 18:2*	Lipids	LPC	17726000	19868000	16753000	34689000	14997000	18140000	--	--
pmp000682	520.168	C26H32O11	Matairesinoside	Lignans and Coumarins	Lignans	4584.1	13302	35329	10004000	10177000	8272100	--	--
pmn001378	520.194	C26H32O11	Terpineol monO-glucoside	Lignans and Coumarins	Lignans	586320	1194300	1375100	7225600	5390600	5771000	--	--
Lmhp010190	521.348	C26H52NO7P	LysoPC 18:1(2n isomer)*	Lipids	LPC	23241000	20952000	24646000	7736900	2868900	6949400	--	--
pmp001281	521.348	C26H52NO7P	LysoPC 18:1*	Lipids	LPC	9	9	9	5981300	2060500	4090200	--	--
HJAP018	522.1	C23H22O14	Myricetin O-acetyl-hexoside	Flavonoids	Flavonols	9	9	9	18021	48691	50484	--	--
pmb3041	522.101	C23H22O14	Tricin O-saccharic acid*	Flavonoids	Flavones	48717	78424	76251	37698	22668	19174	--	--
Lmyn003971	522.21	C26H34O11	Dihydrodehydrodiconiferyl alcohol-4-O-glucoside	Lignans and Coumarins	Lignans	79987	380400	517240	9	9	9	--	--
Cmsp005051	522.21	C26H34O11	(+)-Isolariciresinol-9-O-β-D-glucopyranoside	Lignans and Coumarins	Lignans	4734.7	80382	58978	32098	40234	24876	--	--
Lmtn002596	522.21	C26H34O11	dihydrodehydrodiconiferyl alcohol 4-O-β-D-glucopyranosides	Lignans and Coumarins	Lignans	110760	461350	533090	9	9	9	--	--
pmd0136	523.364	C26H54NO7P	LysoPC 18:0(2n isomer)*	Lipids	LPC	632880	814410	873290	162170	67597	111970	--	--
mws0126	523.364	C26H54NO7P	LysoPC 18:0*	Lipids	LPC	632880	814410	873290	162170	67597	111970	--	--
Lmtn003096	524.226	C26H36O11	(-)-secoisolariciresinol 4-O-β-D-giucopyranoside	Lignans and Coumarins	Lignans	19487	111840	98610	9	13550	11690	--	--
Lmjp003731	530.142	C26H26O12	3,4-O-Dicaffeoylquinic acid Methyl Ester	Phenolic acids	Phenolic acids	9	9	9	131760	75107	130900	--	--
Lmhp010908	535.364	C27H54NO7P	LysoPC 19:1	Lipids	LPC	367430	187840	278210	345770	200290	257090	--	--
pmn001375	536.189	C26H32O12	1-Hydroxyterpinin monO-glucoside	Lignans and Coumarins	Lignans	12852	15624	22171	658460	862780	606890	--	--
Hmln002100	536.189	C26H32O12	Nortrachelogenin 4-O-β-D-glucoside	Lignans and Coumarins	Lignans	9	9	9	2491500	2221800	2183600	--	--
pmc0960	543.332	C28H50NO7P	LysoPC 20:4	Lipids	LPC	12583	9	17632	131350	24505	45754	--	--
Lmhp009890	545.348	C28H52NO7P	LysoPC 20:3	Lipids	LPC	1672900	1287800	1620000	1295200	514340	830270	--	--
pmd0146	547.364	C28H54NO7P	LysoPC 20:2(2n isomer)*	Lipids	LPC	220610	181620	181640	2618600	874000	1637100	--	--
pmd0147	547.364	C28H54NO7P	LysoPC 20:2*	Lipids	LPC	465250	420700	281260	1779100	614330	1303000	--	--
Lmhp011549	549.379	C28H56NO7P	LysoPC 20:1	Lipids	LPC	40539	15791	12955	79283	23821	39101	--	--
pma0702	557.274	C29H39N3O8	N1,N8-Bis(sinapoyl)spermidine	Alkaloids	Phenolamine	18831	54440	77695	157270	54745	125940	C21170	--
pmb3114	562.148	C30H26O11	Epicatechin-epiafzelechin	Flavonoids	Flavanols	9	9	9	1212500	278190	882520	--	--
pmb2922	566.055	C15H24N2O17P2	Uridine 5'-diphospho-D-glucose	Nucleotides and derivatives	Nucleotides and derivatives	2268500	3203300	3298300	3914900	1845300	4126800	C00029	ko00040,ko00052,ko00053,ko00240,ko00500,ko00520,ko00524,ko00561,ko00908,ko01100,ko01110,ko01240
pmb0837	576.127	C30H24O12	Procyanidin A3	Tannins	Proanthocyanidins	1944.9	9	9	216890	200950	230580	--	--
pmp000274	578.142	C30H26O12	Procyanidin B3*	Tannins	Proanthocyanidins	16946	11622	11002	5268300	4546000	4819200	--	--
pmn001667	578.142	C30H26O12	Procyanidin B4*	Tannins	Proanthocyanidins	3524.9	9	9746	1401400	3403400	2481800	C10238	--
mws0836	578.142	C30H26O12	Procyanidin B1*	Tannins	Proanthocyanidins	3472.7	10903	42237	21873000	21066000	15961000	--	--
pme0434	578.142	C30H26O12	Procyanidin B2*	Tannins	Proanthocyanidins	14686	9	41857	27072000	40299000	30467000	C17639	--
pme2493	578.164	C27H30O14	Kaempferol-3,7-O-dirhamnoside(Kaempferitrin)	Flavonoids	Flavonols	2365.7	5445.6	27269	543170	1381600	1163600	C16981	--
mws1409	580.034	C15H22N2O18P2	Uridine-5′-diphosphoglucuronic acid	Nucleotides and derivatives	Nucleotides and derivatives	70143	75199	74667	48888	32681	35362	--	--
Lmcn003163	580.085	C28H20O14	Epitheaflavic acid-3-O-Gallate	Flavonoids	Flavanols	9	13019	141410	33702000	38527000	33060000	--	--
Hmcp001769	580.142	C26H28O15	Quercetin-O-rhamnoside-O-Pentoside	Flavonoids	Flavonols	9	9	9	109490	93578	64242	--	--
pmp000238	580.143	C26H28O15	Luteolin-7-O-β-D-glucosyl-6-C-α-L-arabinose	Flavonoids	Flavonoid carbonoside	712.75	713.25	748.21	20036	6251.1	20765	--	--
pmb0566	580.143	C26H28O15	Luteolin-O-hexosyl-O-pentoside	Flavonoids	Flavones	1550.1	700.68	1615.3	51627	7657.8	35100	--	--
Lmqn001932	580.216	C28H36O13	Syringaresinol-4'-O-β-D-monO-glucoside	Lignans and Coumarins	Lignans	3554.3	9	7105.7	114320	49828	136030	--	--
pmb0492	583.268	C34H37N3O6	N',N'',N'''-p-Coumaroyl-cinnamoyl-caffeoyl spermidine	Alkaloids	Phenolamine	262330	170970	239860	371130	503390	275660	--	--
Lmmp003672	592.158	C31H28O12	8,8'-Methylenebiscatechin	Flavonoids	Flavanols	9	834.73	3363.4	1040000	993040	1049600	--	--
Hmcp001829	594.158	C27H30O15	Quercetin-O-rhamnoside-O-rhamnoside	Flavonoids	Flavonols	9	1573.2	9	33836	21530	45209	--	--
Lmjp002867	594.158	C27H30O15	Kaempferol 3-O-β-D-neohesperidoside	Flavonoids	Flavonols	2545.9	12665	167000	9	34751	12716	--	--
Lmqn000780	607.082	C17H27N3O17P2	Uridine 5'-diphospho-N-acetylglucosamine	Nucleotides and derivatives	Nucleotides and derivatives	145290	156640	212570	252620	69412	367270	C00043	ko00520,ko00524,ko01100
Zmjp003072	610.132	C30H26O14	Quercetin-p-coumaroyl hexose	Flavonoids	Flavones	12466	51188	686660	27086	192700	85010	--	--
Hmmp002336	610.148	C30H26O14	Quercetin-O-feruloyl-Pentoside	Flavonoids	Flavonols	28566	124370	1306000	49345	293240	146990	--	--
pmb0588	610.153	C27H30O16	Luteolin-3',7-di-O-glucoside	Flavonoids	Flavones	9	4262.8	3545.7	20493	9949.8	27345	--	--
mws0059	610.153	C27H30O16	Quercetin-3-O-rutinoside (Rutin)	Flavonoids	Flavonols	4844.8	16133	279420	9	86083	24213	C05625	ko00944,ko01100,ko01110
Lmbp002336	610.153	C27H30O16	Quercetin-3-O-(2-O-α-L-rhamnopyranosyl)-β-D-galactopyranoside	Flavonoids	Flavonols	6832	11033	16154	56182	88751	103460	--	--
pmn001583	610.153	C27H30O16	Quercetin-3-O-robinobioside*	Flavonoids	Flavonols	5378.7	26161	363630	14930	102350	37143	--	--
pmb0711	610.153	C27H30O16	Quercetin-7-O-rutinoside*	Flavonoids	Flavonols	19356	118960	1322600	40871	285500	126100	--	--
pmb3264	612.152	C20H32N6O12S2	Oxiglutatione	Amino acids and derivatives	Amino acids and derivatives	784460	358960	393960	793410	1327800	720560	C00127	ko00480,ko01100,ko01240
Lmyp003873	616.106	C28H24O16	Quercetin 3-O-(2″-galloyl)-β-D-glucopyranoside	Flavonoids	Flavonols	615.17	1179	570.65	86065	49048	48787	--	--
Xmyp005746	624.169	C28H32O16	Isorhamnetin-3-O-rutinoside	Flavonoids	Flavones	5008.6	6654.6	56685	29321	23728	32538	--	--
Hmln001836	652.164	C29H32O17	Kaempferol-3-O-(6''-Acetyl)glucosyl-(1→3)-Galactoside	Flavonoids	Flavonols	9	9	9	61085	17223	43253	--	--
pmb0530	663.109	C21H27N7O14P2	Nicotinic acid adenine dinucleotide	Nucleotides and derivatives	Nucleotides and derivatives	1249100	1621200	1713400	1629000	1112100	1147800	C00003	ko00190,ko00730,ko00760,ko01100,ko01240
pmb2819	666.201	C27H38O19	O-Caffeoyl maltotriose	Phenolic acids	Phenolic acids	8971.5	18119	20314	1026.7	1776.6	515.28	--	--
Lmqn000213	666.222	C24H42O21	Stachyose	Others	Saccharides and Alcohols	5498.3	6835.7	10242	3629.2	8476.3	6571.3	C01613	ko00052,ko01100
Lmhp008744	676.367	C33H56O14	1-α-Linolenoyl-glycerol-diglucoside*	Lipids	Glycerol ester	5480.6	5878.4	9	29964	16611	36861	--	--
Lmhp008513	676.367	C33H56O14	2-γ-Linolenoyl-glycerol-diglucoside*	Lipids	Glycerol ester	3844.4	1942.5	6907.3	35545	34253	32939	--	--
Lmhp009190	678.383	C33H58O14	2-Linoleoylglycerol-diglucoside*	Lipids	Glycerol ester	19204	13539	10909	13666	10813	20094	--	--
Lmhp009384	678.383	C33H58O14	1-Linoleoylglycerol-diglucoside*	Lipids	Glycerol ester	26884	9	25802	14651	19648	19287	--	--
Hmln001931	682.247	C32H42O16	Matairesinol 4,4'-di-O-β-D-glucoside	Lignans and Coumarins	Lignans	4163.7	10085	6295.1	72379	26046	33228	--	--
pmn001370	682.247	C32H42O16	Pinoresinol diglucoside	Lignans and Coumarins	Lignans	7244.2	10084	4516.5	597290	174920	419630	--	--
Xmyp004678	726.201	C32H38O19	Kaempferol 3-O-[2-O-β-D-xylose-6-O-a-L-rhamnose]-β-D-glucoside	Flavonoids	Flavonols	3625.9	1485.4	6543.5	9	9	9	--	--
pme2651	743.075	C21H28N7O17P3	NADP (Nicotinamide adenine dinucleotide phosphate)	Nucleotides and derivatives	Nucleotides and derivatives	207730	263020	223290	178750	94646	76997	C00006	ko00195,ko00480,ko00760,ko01100,ko01240
pme2746	785.157	C27H33N9O15P2	Flavin adenine dinucleotide(FAD)	Nucleotides and derivatives	Nucleotides and derivatives	1276500	1167400	1446600	432890	100050	235120	C00016	ko00740,ko01100,ko01110,ko01240
pmn001647	866.206	C45H38O18	Procyanidin C2*	Tannins	Proanthocyanidins	9	9	9	1376100	1869000	1351200	--	--
pmp000101	866.206	C45H38O18	Arecatannin C1*	Tannins	Tannin	1767.5	1230.7	1843.4	191380	135690	168080	C17897	--
pmp000100	866.206	C45H38O18	Arecatannin B1*	Tannins	Tannin	9	9	9	270330	248070	248240	C17892	--
pmn001646	866.206	C45H38O18	Procyanidin C1*	Tannins	Proanthocyanidins	9	9	9	450870	753320	504550	C17624	--
pmb2947	866.206	C45H38O18	Catechin-catechin-catechin	Flavonoids	Flavanols	9	9	9	1003900	1579200	1337500	--	--
